## Expanding the Genetic Architecture of Nicotine Dependence and its Shared Genetics with Multiple Traits: Findings from the Nicotine Dependence GenOmics (iNDiGO) Consortium

Bryan C. Quach<sup>1</sup>, Michael J. Bray<sup>2</sup>, Nathan C. Gaddis<sup>3</sup>, Mengzhen Liu<sup>4</sup>, Teemu Palviainen<sup>5</sup>, Camelia C. Minica<sup>7</sup>, Stephanie Zellers<sup>4</sup>, Richard Sherva<sup>6</sup>, Fazil Aliev<sup>8</sup>, Michael Nothnagel<sup>9</sup>, Kendra A. Young<sup>10</sup>, Jesse Marks<sup>1</sup>, Hannah Young<sup>4</sup>, Yuelong Guo<sup>11,12</sup>, Alex Waldrop<sup>3</sup>, Nancy Sey<sup>13</sup>, Maria T. Landi<sup>14</sup>, Daniel W. McNeil<sup>15,16</sup>, Lindsay A. Farrer<sup>6,17,18,19,20</sup>, Christina A. Markunas<sup>1</sup>, Jacqueline Vink<sup>21</sup>, Jouke-Jan Hottenga<sup>7</sup>, William G. Iacono<sup>4</sup>, Henry R. Kranzler<sup>22,23</sup>, Nancy L. Saccone<sup>24</sup>, Michael C. Neale<sup>25,26</sup>, Pamela Madden<sup>2</sup>, Marcella Rietschel<sup>27</sup>, Mary L. Marazita<sup>28</sup>, Matthew McGue<sup>4</sup>, Hyejung Won<sup>13</sup>, Georg Winterer<sup>29</sup>, Richard Grucza<sup>2</sup>, Danielle Dick<sup>8,30,31</sup>, Joel Gelernter<sup>32,33,34,35</sup>, Neil E. Caporaso<sup>14</sup>, Timothy B. Baker<sup>36</sup>, Dorret I. Boomsma<sup>7</sup>, Jaakko Kaprio<sup>5,37</sup>, John E. Hokanson<sup>10</sup>, Scott Vrieze<sup>4</sup>, Laura J. Bierut<sup>2</sup>, Eric O. Johnson<sup>1,38</sup>, and Dana B. Hancock<sup>1</sup>

1. Center for Omics Discovery and Epidemiology, Behavioral Health Research Division, RTI International, Research Triangle Park, North Carolina, USA;
2. Department of Psychiatry, Washington University, St. Louis, Missouri, USA;
3. Research Computing Division, RTI International, Research Triangle Park, North Carolina, USA;
4. Department of Psychology, University of Minnesota Twin Cities, Minneapolis, Minnesota, USA;
5. Institute for Molecular Medicine Finland (FIMM), University of Helsinki, Helsinki, Finland;
6. Department of Medicine (Biomedical Genetics), Boston University School of Medicine, Boston, Massachusetts, USA;
7. Department of Biological Psychology, Vrije Universiteit, Amsterdam, The Netherlands;
8. Department of Psychology, Virginia Commonwealth University, Richmond, Virginia, USA;
9. Institute of Medical Informatics and Statistics, Christian-Albrechts University, Kiel, Germany;
10. Department of Epidemiology, University of Colorado Anschutz Medical Campus, Aurora, Colorado, USA;
11. Center for Genomics in Public Health and Medicine, Biostatistics and Epidemiology Division, RTI International, Research Triangle Park, North Carolina, USA;
12. GeneCentric Therapeutics, Research Triangle Park, North Carolina, USA;
13. Department of Genetics, University of North Carolina at Chapel Hill, Chapel Hill, North Carolina, USA;
14. Genetic Epidemiology Branch, Division of Cancer Epidemiology and Genetics, National Cancer Institute, National Institutes of Health, United States department of Health and Human Services, Bethesda, Maryland, USA;
15. Department of Psychology, West Virginia University, Morgantown, West Virginia, USA;

16. Department of Dental Practice and Rural Health, West Virginia University, Morgantown, West Virginia, USA;
17. Department of Neurology, Boston University School of Medicine, Boston, Massachusetts, USA;
18. Department of Ophthalmology, Boston University School of Medicine, Boston, Massachusetts, USA;
19. Department of Epidemiology, Boston University School of Public Health, Boston, Massachusetts, USA;
20. Department of Biostatistics, Boston University School of Public Health, Boston, Massachusetts, USA;
21. Behavioural Science Institute, Radboud University, Nijmegen, The Netherlands;
22. Department of Psychiatry, University of Pennsylvania Perelman School of Medicine, Philadelphia, Pennsylvania, USA;
23. VISN 4 MIRECC, Crescenz VA Medical Center, Philadelphia, Pennsylvania, USA;
24. Department of Genetics, Washington University, St. Louis, Missouri, USA;
25. Virginia Institute for Psychiatric and Behavioral Genetics, Virginia Commonwealth University, Richmond, Virginia, USA;
26. Department of Psychiatry, Virginia Commonwealth University, Richmond, Virginia, USA;
27. Department of Genetic Epidemiology in Psychiatry, Central Institute of Mental Health, Medical Faculty Mannheim, University of Heidelberg, Mannheim, Germany;
28. Center for Craniofacial and Dental Genetics, Department of Oral Biology, University of Pittsburgh, Pittsburgh, Pennsylvania, USA;
29. Experimental & Clinical Research Center, Department of Anesthesiology and Operative Intensive Care Medicine, Charité - University Medicine Berlin, Germany;
30. College Behavioral and Emotional Health Institute, Virginia Commonwealth University, Richmond, Virginia, USA;
31. Department of Human & Molecular Genetics, Virginia Commonwealth University, Richmond, Virginia, USA;
32. Department of Psychiatry, Yale University School of Medicine, New Haven, Connecticut, USA;
33. Department of Genetics, Yale University School of Medicine, New Haven, Connecticut, USA;
34. Department of Neuroscience, Yale University School of Medicine, New Haven, Connecticut, USA;
35. Department of Psychiatry, VA CT Healthcare Center, West Haven, Connecticut, USA;
36. Center for Tobacco Research and Intervention, Department of Medicine, University of Wisconsin School of Medicine and Public Health, Madison, Wisconsin, USA;
37. Department of Public Health, Faculty of Medicine, University of Helsinki, Helsinki, Finland;
38. Fellow Program, Behavioral Health Research Division, RTI International, Research Triangle Park, North Carolina, USA;

## 1 **Abstract**

2 Cigarette smoking is the leading cause of preventable morbidity and mortality.  
3 Knowledge is evolving on genetics underlying initiation, regular smoking, nicotine dependence  
4 (ND), and cessation. We performed a genome-wide association study using the Fagerström Test  
5 for ND (FTND) in 58,000 smokers of European or African ancestry. Five genome-wide  
6 significant loci, including two novel loci *MAGI2/GNAII* (rs2714700) and *TENM2* (rs1862416)  
7 were identified, and loci reported for other smoking traits were extended to ND. Using the  
8 heaviness of smoking index (HSI) in the UK Biobank (N=33,791), rs2714700 was consistently  
9 associated, but rs1862416 was not associated, likely reflecting ND features not captured by the  
10 HSI. Both variants were *cis*-eQTLs (rs2714700 for *MAGI2-AS3* in hippocampus, rs1862416 for  
11 *TENM2* in lung), and expression of genes spanning ND-associated variants was enriched in  
12 cerebellum. SNP-based heritability of ND was 8.6%, and ND was genetically correlated with 13  
13 other smoking traits ( $r_g=0.40-0.95$ ) and co-morbid diseases. Our results emphasize the FTND as  
14 a composite phenotype that expands genetic knowledge of smoking, including loci specific to  
15 ND.

## 16 **Introduction**

17 Cigarette smoking remains the leading cause of preventable death worldwide,<sup>1</sup> despite the  
18 well-known adverse health effects. Smoking causes more than 7 million deaths annually from a  
19 multitude of diseases including cancer, chronic obstructive pulmonary disease (COPD), and  
20 heart disease.<sup>1,2</sup> Cigarette smoking is a multi-stage process consisting of initiation, regular  
21 smoking, nicotine dependence (ND), and cessation. Each step has a strong genetic component  
22 (for example, twin-based heritability estimates up to 70% for the transition from regular smoking  
23 to ND<sup>3,4</sup>), and partial overlaps are expected among the sets of sequence variants correlating with

24 the different stages,<sup>3</sup> evidenced by findings of the GWAS and Sequencing Consortium of  
25 Alcohol and Nicotine use (GSCAN) with sample sizes up to 1.2 million individuals.<sup>5</sup> GSCAN  
26 identified 298 genome-wide significant loci associated with initiation (ever vs. never smoking),  
27 age at initiation, cigarettes per day (CPD), and/or cessation (current vs. former smoking); 259 of  
28 the loci harbored significant associations with initiation.<sup>5</sup>

29 In comparison to other stages of smoking, known loci for ND are limited. Only six  
30 reproducible, genome-wide significant loci have been identified: *CHRNA3-CHRNA6* (chr8p11),  
31 *DBH* (chr9q34), *CHRNA5-CHRNA3-CHRNA4* (chr15q25), *DNMT3B* and *NOL4L* (chr20q11),  
32 and *CHRNA4* (chr20q13).<sup>6</sup> A more complete understanding of the genetics underlying ND is  
33 needed, as it could help to predict the likelihood of quitting smoking, withdrawal severity,  
34 response to treatment, and health-related consequences.<sup>7-10</sup> The Fagerström Test for ND (FTND),  
35 also called the Fagerström Test for Cigarette Dependence,<sup>11</sup> provides a composite phenotype that  
36 captures multiple behavioral and psychological features of ND.<sup>12</sup> Expanding upon our prior  
37 analyses of studies comprising our Nicotine Dependence GenOmics (iNDiGO) Consortium,<sup>13,14</sup>  
38 we report findings from the largest GWAS meta-analysis for ND (N=58,000; 46,213 European  
39 [EUR] and 11,787 African American [AA] ancestry participants from 23 studies) to identify  
40 novel genetic loci associated with ND, assess genetic correlations between ND and other  
41 phenotypes and gene expression patterns, and test GSCAN-identified loci<sup>5</sup> for effects on ND.

## 42 **Results**

### 43 ***Cross-ancestry GWAS meta-analysis finds two novel SNP associations with ND***

44 Our cross-ancestry ND GWAS meta-analysis ( $\lambda=1.034$ , **Supplementary Figure 1A**)  
45 identified five genome-wide significant loci (**Figure 1**). Associations of the lead SNPs from each

46 of these five loci are shown in **Table 1**. All genome-wide significant SNP/indel associations  
47 from the cross-ancestry meta-analysis are provided in **Supplementary Table 5**.

48 Three of the genome-wide significant loci have known associations with ND from our  
49 prior GWAS and others<sup>6</sup>: chr15q25<sup>13-15</sup> (smallest  $P=1.6\times 10^{-39}$  for rs16969968, a well-established  
50 functional missense [D398N] *CHRNA5* SNP<sup>16</sup>), chr20q13<sup>13</sup> (smallest  $P=1.2\times 10^{-12}$  for  
51 rs151176846, an intronic *CHRNA4* SNP), and chr9q34<sup>14</sup> (smallest  $P=1.1\times 10^{-8}$  for rs13284520,  
52 an intronic *DBH* SNP). The loci spanning nicotinic acetylcholine receptor genes (*CHRNA5-A3-*  
53 *B4* and *CHRNA4*), but no novel loci, were identified at genome-wide significance in the EUR-  
54 specific GWAS meta-analysis ( $\lambda=1.036$ , **Supplementary Figures 1B** and **2A**). No genome-wide  
55 significant loci were found in the AA-specific GWAS meta-analysis ( $\lambda=1.032$ , **Supplementary**  
56 **Figures 1C** and **2B**).

57 Two genome-wide significant loci from the cross-ancestry meta-analysis represent novel  
58 associations with ND. On chr7q21, the most significant SNP ( $P=2.3\times 10^{-9}$ ) was rs2714700, a SNP  
59 between the *MAGI2* and *GNAI1* genes (**Supplementary Figures 3A–B**). The most significant  
60 SNP on chr5q34, rs1862416 ( $P=1.5\times 10^{-8}$ ), sits within an intron for *TENM2* (**Supplementary**  
61 **Figures 3C–D**). Both SNPs imputed well: sample size-weighted mean estimated  $r^2$  values were  
62 0.97 for rs2714700 and 0.92 for rs1862416. Further, both SNPs were common, and their  
63 associations with ND were observed across EURs and AAs (**Table 1**) and were largely  
64 consistent across studies (**Supplementary Figure 4A–B**): rs2714700-T being associated with  
65 reduced risk (meta-analysis OR [95% CI]=0.96 [0.94–0.97]) and rs1862416-T being associated  
66 with increased risk (meta-analysis OR [95% CI]=1.08 [1.05–1.11]) for severe vs. mild ND.  
67 Neither SNP showed evidence for heterogeneity, based on the  $I^2$  index<sup>17</sup>, across studies ( $P=0.83$   
68 for rs2714700 and 0.75 for rs1862416). Leave-one-study-out analyses (**Supplementary Table 6**)

69 revealed some variability in p-values ( $P=3.1\times 10^{-7}$ – $7.4\times 10^{-9}$  for rs2714700 and  $P=5.6\times 10^{-9}$ –  
70  $3.9\times 10^{-6}$  for rs1862416), likely due to fluctuating statistical power given the significant  
71 correlation between N and p-value across iterations:  $r=-0.65$ ,  $P=8.6\times 10^{-5}$ . However, there was  
72 little variation in the effect sizes (range of  $\beta$  values corresponding to the OR for severe vs. mild  
73 ND = 0.95–0.96 for rs2714700-T and 1.07–1.08 for rs1862416-T).

74 We compared the novel ND-associated SNPs with results reported for other smoking  
75 traits by GSCAN.<sup>5</sup> Both the *MAGI2/GNAII* SNP rs2714700 and the *TENM2* SNP rs1862416  
76 were nominally associated at  $P<0.05$  with ever vs. never smoking and rs2714700 with CPD in  
77 consistent directions with ND; neither SNP was associated with age at initiation or smoking  
78 cessation (**Supplementary Table 7**). Because rs1862416 was located within the boundaries of a  
79 genome-wide significant locus for ever smoking (chr5:164,596,435-168,114,971), we used  
80 GCTA to assess the independence of association signals via conditional modeling. All 6 lead  
81 SNPs in this GSCAN-identified locus were in low LD with rs1862416 (maximum  $r^2=0.0047$   
82 [**Supplementary Figure 5**], maximum  $D'=0.46$ ), and three were nominally associated with ND  
83 at  $P<0.05$  (**Supplementary Table 8**). Among our iNDiGO studies, rs1862416 remained  
84 associated with ND in models conditioned on each GSCAN lead SNP individually ( $P=7.9\times 10^{-8}$ –  
85  $1.8\times 10^{-8}$ ) and with all 6 SNPs taken together ( $P=2.2\times 10^{-7}$ ). Rs2714700 was located  $>1$  MB away  
86 from any GSCAN-identified locus, so conditional modeling was not necessary. These results  
87 suggest that the novel rs2714700 and rs1862416 associations with ND are independent of any  
88 GSCAN-identified loci.

89 For independent testing, we analyzed the two novel SNPs (rs2714700 and rs1862416) for  
90 association with HSI in the UK Biobank. Results are shown in **Supplementary Table 9**. The  
91 *MAGI2/GNAII* SNP, rs2714700, was associated with HSI at  $P=0.014$ , which surpassed

92 Bonferroni correction for two SNP tests, and meta-analysis of all discovery studies with UK  
93 Biobank (total N=91,791) supported rs2714700-T being associated with milder ND ( $P=7.7\times 10^{-9}$ ).  
94 The *TENM2* SNP, rs1862416, was not associated with HSI in the UK Biobank ( $P=0.39$ ).

95 To determine the factors of ND that drove the novel genome-wide associations, we  
96 returned to the iNDiGO studies, tested SNP associations with each specific FTND item, and  
97 combined results via cross-ancestry meta-analyses. For rs2714700, we observed the lowest p-  
98 values for the two items that comprise the HSI (**Figure 2A**): TTFC ( $P=5.3\times 10^{-4}$ ) and CPD  
99 ( $P=1.1\times 10^{-3}$ ). Rs2714700 was also associated at  $P<0.05$  with difficult in refraining from smoking  
100 in forbidden places ( $P=0.025$ ) and the cigarette most hated to give up ( $P=0.030$ ). Rs1862416 was  
101 associated with TTFC ( $P=0.018$ ) and two items that are not captured by the HSI: the cigarette  
102 most hated to give up ( $P=0.015$ ) and smoking when ill ( $P=0.023$ ) (**Figure 2B**).

### 103 ***GWAS findings for other smoking traits extend to ND***

104 We assessed whether genome-wide significant SNPs identified for smoking traits in  
105 GSCAN extended to ND using results from the cross-ancestry GWAS meta-analysis. We  
106 focused on the 55 genome-wide significant SNPs from 40 loci associated with CPD, given that it  
107 displayed the best genetic correlation with ND (**Figure 3**). After applying Bonferroni correction  
108 for the 53 SNPs that were available in our meta-analysis ( $P<9.4\times 10^{-4}$ ), 17 SNPs had a  
109 statistically significant and directionally consistent association with ND (**Table 2**). These SNPs  
110 span six loci reported at genome-wide or nominal significance in prior GWAS of ND (*CHRNA5-*  
111 *A3-B4* [chr15], *CHRNA4* [chr20], *DBH* [chr9], *CHRNA3* [chr8], *CYP2A6* [chr19], and *NOL4L*  
112 [near *DNMT3B*, chr20])<sup>6</sup> and three loci not reported in prior ND GWAS—*DRD2* (chr11),  
113 *CI6orf97* (chr16), and *CHRNA2* (chr1).

### 114 ***ND is genetically correlated with 13 other phenotypes***

115 We estimated the heritability explained by common SNPs of ND at  $h_g^2$  (standard error) =  
116 0.086 (0.012), using LDSC<sup>18</sup> and the EUR-specific GWAS meta-analysis results. We also found  
117 statistically significant genetic correlations of ND with 13 phenotypes (Bonferroni-corrected  
118  $P < 0.0011$ ; **Figure 3** and **Supplementary Table 3**). Positive correlations indicate that the genetic  
119 predisposition to higher ND risk was correlated with genetic risks for other smoking traits  
120 (smallest  $P = 3.1 \times 10^{-70}$  for higher CPD [ $r_g = 0.95$ ], followed by  $P = 3.2 \times 10^{-16}$  for current smoking  
121 [ $r_g = 0.54$ ] and  $P = 3.2 \times 10^{-16}$  for ever smoking [ $r_g = 0.40$ ]). We repeated LDSC, after removing all  
122 chr15q25 variants between 78.5 and 79.5 MB and found only negligible differences in these  
123 correlations ( $r_g = 0.94$  for higher CPD,  $r_g = 0.51$  for current smoking, and  $r_g = 0.42$  for ever  
124 smoking). Beyond the smoking traits, with all SNPs included, higher ND was genetically  
125 correlated with higher risks of alcohol dependence, neuroticism, psychiatric diseases (major  
126 depressive disorder and its symptoms and schizophrenia), and smoking-related consequences  
127 (lung cancer and coronary artery disease). Among these positively correlated traits,  $r_g$  values  
128 ranged from 0.16 (schizophrenia) to 0.77 (squamous cell lung cancer). Higher risk of ND was  
129 genetically correlated with lower age of smoking initiation ( $r_g = -0.55$ ) and fewer years of  
130 schooling ( $r_g = -0.33$ ).

131 ***Gene expression data implicates target genes for novel ND-associated SNPs and identifies ND***  
132 ***heritability enrichment in cerebellum***

133 Rs2714700, an intergenic SNP, is not a significant *cis*-eQTL with any gene-level  
134 expression in GTEx (v8), but it was implicated as a *cis*-eQTL for the *MAGI2-AS3* transcript in  
135 hippocampus from BrainSeq<sup>19</sup> ( $N = 551$ ;  $P = 8.5 \times 10^{-4}$ ). The protective allele for ND (rs2714700-T)  
136 was associated with higher expression of the *MAGI2-AS3* transcript ENST00000414797.5.



137           Rs1862416 is annotated to enhancer histone marks in brain (specifically, germinal matrix  
138 during fetal development and the developed prefrontal cortex, anterior caudate, and cingulate  
139 gyrus tissues) and several other tissues in HaploReg.<sup>20</sup> It is also located in the promoter of *CTB-*  
140 *77H17.1*, which is a novel antisense RNA transcript encoded within a *TENM2* intron. In GTEx,  
141 rs1862416 was reported as a significant lung-specific *cis*-eQTL SNP *TENM2*. The ND risk-  
142 conferring allele (rs1862416-T) was associated with decreased gene-level *TENM2* expression in  
143 lung. *CTB-77H17.1* was too lowly expressed across GTEx tissues to test its expression levels by  
144 rs1862416.

145           To assess the enrichment of the EUR-specific ND GWAS meta-analysis results to  
146 specific gene expression patterns, we applied LDSC-SEG<sup>21</sup> with reference to 205 tissues/cell  
147 types with publicly available gene expression data. We observed statistically significant  
148 enrichment in one tissue (cerebellum) at Bonferroni-corrected  $P < 2.4 \times 10^{-4}$  (**Supplementary**  
149 **Table 4**), indicating that genes spanning ND-associated SNPs are enriched for specific  
150 expression in the cerebellum relative to other tissues/cell types.

## 151 **Discussion**

152           We expanded current knowledge of ND in this largest GWAS to date, by identifying two  
153 novel genome-wide significant loci as well as 3 known loci, extending associations of additional  
154 loci implicated for other smoking phenotypes, and detecting significant genetic correlations of  
155 ND with 13 other complex phenotypes and with gene expression in cerebellum. The top novel  
156 SNPs between *MAGI2* and *GNAI1* (chr7q21) and in *TENM2* (chr5q34) were independent of  
157 previously reported GWAS signals for any smoking trait. Three of our genome-wide significant  
158 loci were known: (1) *CHRNA5-CHRNA3-CHRNA4* (chr15q25) is irrefutably associated with  
159 ND, as driven largely by CPD.<sup>6</sup> (2) Our initial GWAS meta-analysis of 5 studies (now part of the

160 iNDiGO consortium)<sup>13</sup> identified *CHRNA4* (chr20q13) at genome-wide significance. Subsequent  
161 associations were found with heavy vs. never smoking in the UK Biobank<sup>22</sup> and with initiation,  
162 CPD, and cessation in GSCAN.<sup>5</sup> (3) *DBH* (chr9q34) was first identified as genome-wide  
163 significant for smoking cessation but later associated with ND in our meta-analysis of 15 studies  
164 (now part of the iNDiGO consortium)<sup>14</sup> and with CPD and cessation in GSCAN.<sup>5</sup>

165         The novel ND-associated locus with lead SNP rs2714700 is intergenic between *MAGI2*  
166 (membrane associated guanylate kinase, WW and PDZ domain containing 2) and *GNAI1* (G  
167 protein subunit alpha i1). We identified rs2714700 at genome-wide significance for its  
168 association with ND, which was driven by CPD (unlike rs1862416), TTFC, and other FTND  
169 items, indicating that this SNP association may reflect both primary and secondary features of  
170 ND. Rs2714700 was also associated with HSI in the independent UK Biobank. The *cis*-eQTL  
171 evidence for rs2714700 in the hippocampus suggests that it may influence expression of the long  
172 noncoding RNA *MAGI2-AS3* (*MAGI2* antisense RNA 3). *MAGI2-AS3* has been mainly studied  
173 for its role in the progression of cancer, including glioma in the brain.<sup>23</sup> No genome-wide  
174 significant associations have been reported within 1MB of rs2714700 in the GWAS catalog. Our  
175 evidence of genome-wide significance for rs2714700 points to a novel locus that has not been  
176 associated with smoking or any related trait, and its functional relevance merits further  
177 investigation.

178         We also observed a genome-wide significant association of ND with rs1862416, a lung-  
179 specific *cis*-eQTL for *TENM2*. *TENM2* encodes teneurin transmembrane protein 2, a cell surface  
180 receptor that plays a fundamental role in neuronal connectivity and synaptogenesis.<sup>24</sup> With  
181 rs1862416 residing in the promoter of *CTB-77H17.1*, it could influence this antisense RNA,  
182 which in turn could dysregulate its sense transcript, *TENM2*. As an illustrative example, the

183 autism-associated SNP rs4307059 is annotated to and acts as a promoter region *cis*-eQTL for the  
184 antisense RNA *MSNPIAS* (moesin pseudogene 1, antisense) that influences regulation of its  
185 sense transcript, *MSN*.<sup>25</sup> However, while rs1862416 is generally indicated for its potential  
186 regulatory role (i.e., enhancer and promoter annotations and *cis*-eQTL evidence), its specific  
187 effect on either *CTB-77H17.1* or *TENM2* regulation in brain tissue was not evident in currently  
188 available data.

189 Further, independent association testing using HSI in the UK Biobank did not yield  
190 statistical significance for rs1862416. This lack of association may be due to rs1862416  
191 influencing components of ND that are not fully captured by the two FTND items that comprise  
192 the HSI (TTFC and CPD), as suggested by the specific FTND item association testing among the  
193 iNDiGO studies. Rs1862416 was suggestively associated ( $P < 0.05$ ) with TTFC, “Which cigarette  
194 would you hate most to give up?” (the first one in the morning vs. all others), and “Do/did you  
195 smoke if you are so ill that you are in bed most of the day?” (yes/no). These item responses  
196 reflect withdrawal symptoms that are indicative of secondary features of ND (smoking based on  
197 relief of negative effects or situation), as compared with primary (or core) features of ND that are  
198 necessary and sufficient for habit formation (heaviness of smoking [tolerance], automaticity, loss  
199 of control, and craving).<sup>26-29</sup> Having the composite ND phenotype may have enhanced our power  
200 for discovering *TENM2*, but its detection in the UK Biobank may have been limited by the  
201 reliance on the HSI.

202 Beyond our discovery of rs1862416 with ND, SNPs across the *TENM2* gene have been  
203 identified at genome-wide significance, as presented in the GWAS catalog<sup>30</sup>, for educational  
204 attainment,<sup>31</sup> smoking initiation (ever vs. never smoking),<sup>5,32-34</sup> age of smoking initiation,<sup>5</sup>  
205 smoking cessation (current vs. former smoking),<sup>5</sup> alcohol consumption (drinks per week),<sup>5</sup> lung

206 function,<sup>34,35</sup> height,<sup>34</sup> number of sexual partners,<sup>32</sup> depression,<sup>36,37</sup> risk taking tendency,<sup>32</sup> body  
207 mass index,<sup>34</sup> menarche (age at onset)<sup>38</sup>, and regular attendance at a religious group<sup>39</sup>. All  
208 *TENM2* SNPs in the GWAS catalog have very low  $r^2$  values with our novel SNP, rs1862416  
209 (**Supplementary Figure 5**), and we found that rs1862416 was associated with ND  
210 independently from other *TENM2* SNPs implicated in GSCAN. These results suggest that  
211 *TENM2* has pleiotropic effects on ND, traits that are genetically correlated with ND, and other  
212 traits.

213         The genetics of smoking behaviors, more broadly, has rapidly evolved with the GSCAN  
214 consortium having amassed a very large sample size and identified 298 genome-wide significant  
215 loci for smoking traits representing single components: ever vs. never smoking, age of smoking  
216 initiation, CPD, and current vs. former smoking.<sup>5</sup> We observed significant genetic correlations of  
217 each of these smoking traits with ND, yet despite the nearly complete sharing between ND and  
218 CPD specifically, our two novel ND-associated loci were not identified at genome-wide  
219 significance by GSCAN (smallest  $P=0.033$  for rs1862416-T; smallest  $P=0.016$  for rs2714700-T),  
220 suggesting that these loci are specific to ND. These observations resemble previously reported  
221 patterns of genetic correlation between alcohol dependence and alcohol consumption that  
222 suggested shared yet distinct genetics underlying specific measures and composite phenotypes.<sup>40</sup>  
223 Similarly, the majority of GSCAN-identified loci were trait-specific (191 of the 298 loci), where  
224 the other 107 loci were pleiotropic with associations identified for two or more of the smoking  
225 traits.<sup>5</sup> In our evaluation of GSCAN-identified loci, we corroborated associations of several  
226 previously implicated loci for ND (e.g., nicotine acetylcholine receptors genes *CHRNA5-A3-B4*  
227 and *CHRNA4*) and three additional loci (*DRD2*, *C16orf97*, and *CHRNA2*) that have not been  
228 reported in prior ND GWAS. Of these loci, *DRD2* is notable as a long-studied addiction

229 candidate gene<sup>4</sup> and its recent identification as genome-wide significant for alcohol use disorder  
230 for rs4936277<sup>41</sup>, which is correlated ( $r^2=0.94$  in 1000G EUR, 0.82 in 1000G AFR) with  
231 rs7125588, the top SNP identified for CPD in GSCAN and associated with ND in iNDiGO; these  
232 results support a shared genetic effect of *DRD2* underlying addiction. Notably, rs7125588 is not  
233 correlated ( $r^2=0.04$  in 1000G EUR, 0.01 in 1000G AFR) with the *DRD2* variant rs1800497  
234 (Taq1A), which is not significantly associated with ND in iNDiGO ( $P=0.24$ ).

235 Other GSCAN loci were detected for the single component smoking traits but show no  
236 evidence for association in our study (**Supplementary Table 10**), suggesting that these loci  
237 influence stages of smoking other than ND, or they exert weak effects on ND that we were  
238 underpowered to detect. We expect that additional GSCAN-identified loci are associated with  
239 ND, but their detection will require a larger sample size. These results demonstrate the utility of  
240 studying the genetics of the composite ND phenotype and comparing with GWAS of other  
241 smoking traits to tease apart loci that are specific to one stage (i.e., initiation, regular smoking,  
242 ND, cessation) vs. loci that influence multiple stages to better understand the full spectrum of  
243 smoking behaviors.

244 Beyond the smoking traits, we observed significant genetic correlations between ND and  
245 alcohol dependence, years of schooling, neuroticism, comorbid psychiatric traits (major  
246 depression and schizophrenia), and smoking-related health consequences (lung cancer and  
247 coronary artery disease). Some of these observations corroborate prior findings (for example,  
248 alcohol dependence<sup>40</sup> and schizophrenia<sup>42,43</sup> with ND), whereas the other correlations extend to  
249 ND prior observations for the single component smoking traits (for example, CPD with years of  
250 schooling<sup>5</sup>, neuroticism<sup>5</sup>, major depression<sup>5</sup>, coronary artery disease<sup>5</sup>, and lung cancer<sup>44</sup>). The  
251 genetic correlation between ND and gene expression in cerebellum is a notable observation

252 consistent with cerebellum-specific *cis*-eQTL effects observed for the ND-associated *DNMT3B*  
253 SNP rs910083<sup>14</sup> and the age of smoking initiation-associated *CHRNA2* SNP rs11780471<sup>44</sup>, both  
254 of which are also associated with lung cancer. These findings add to the evidence that the  
255 cerebellum may be important for ND risk,<sup>45,46</sup> in addition to the other addiction-relevant brain  
256 tissues. However, since the cerebellum contains a higher neuronal concentration than other brain  
257 tissues,<sup>21,47</sup> future studies are needed to decipher whether the cerebellar gene regulatory effects in  
258 the etiology of ND are due to neuronal activity. Additionally, although genetic correlation  
259 between ND and another trait suggest shared genetics underlying the phenotypes, multiple  
260 mechanisms can produce significant correlations (i.e., unmeasured intermediary phenotypes,  
261 correlated risk variants, mediation).<sup>48-50</sup> Identifying the true mechanistic explanation requires  
262 further investigations.

263         The present ND GWAS meta-analysis follows two prior waves of data assembly by the  
264 iNDiGO consortium (Ns=17,074<sup>13</sup>, 38,602<sup>14</sup>, and now 58,000) and is the largest to date for the  
265 field. Despite still having substantially smaller sample sizes than the GSCAN GWAS, at each  
266 wave, increasing sample size for diverse ancestry groups (EURs and AAs) has illuminated ND-  
267 associated loci, some of which are shared with other stages of smoking while others are specific  
268 to ND. Our present findings underscore the complexity even within the ND phenotype, as our  
269 novel loci displayed patterns of association with specific FTND items that reflect primary or  
270 secondary ND features, e.g., the *TENM2* SNP influenced secondary features that are not captured  
271 simply by heaviness of smoking. Understanding genetic differences that underlie primary vs.  
272 secondary ND may better inform treatment strategies, e.g., changing environmental cues for  
273 individuals whose smoking is driven solely by primary ND features vs. treating withdrawal for  
274 individuals whose ND is augmented with secondary features.<sup>28</sup> Studying the genetics of ND

275 alongside other smoking traits (e.g., initiation and cessation) is key to gaining a better  
276 understanding of the neurobiological perturbations that influence the trajectory of smoking  
277 behaviors and their treatment implications.

## 278 **Methods**

279 We assembled 58,000 participants from 23 iNDiGO consortium studies with genome-  
280 wide single nucleotide polymorphism (SNP) genotypes and FTND phenotype data available for  
281 ever smokers to perform ND GWAS meta-analyses. Fifteen of the studies were included from  
282 our prior GWAS using their original or updated sample sizes (total N increased from 38,602<sup>14</sup> to  
283 46,098 in the current analysis), while 8 studies were added for the current study (total  
284 N=11,902). Participant characteristics are provided in **Supplementary Table 1**, and details of  
285 the study designs, genotyping, quality control, 1000 Genomes (1000G) phase 3 imputation  
286 (unless otherwise stated), and statistical analyses are provided in the **Supplementary Methods**.  
287 Institutional review boards at the respective sites approved the study protocols, and all  
288 participants provided written informed consent.

### 289 ***ND GWAS meta-analysis***

290 The FTND is a well-validated, widely used 6-item questionnaire that assesses  
291 psychologic dependence on nicotine, with scores ranging from 0 (no dependence) to 10 (highest  
292 dependence level).<sup>12,51</sup> As done before,<sup>13,14</sup> we categorized FTND scores as mild (scores 0–3),  
293 moderate (scores 4–6), or severe (scores 7–10). FTND data reflected current smoking behaviors  
294 at the time of interview (i.e., current FTND) or the period of heaviest smoking among ever  
295 smokers (i.e., lifetime FTND). We previously found only small differences in genetic association  
296 results due to any measurement variance when using current vs. lifetime FTND.<sup>52</sup> Two studies  
297 also included low-intensity smokers, who reported  $\leq 10$  CPD but had no data available on other

298 FTND items; these smokers were defined as mildly dependent, given minimal phenotype  
299 misclassification when comparing these FTND and CPD thresholds.<sup>14</sup> The other FTND items  
300 were always required to define moderately and severely dependent smokers. See  
301 **Supplementary Methods** for further details on the ND phenotype data by study.

302 For each study, genome-wide SNP/indel associations with the 3-level categorical ND  
303 outcome were tested within an ancestry group using linear regression. Covariates included age,  
304 sex, principal component eigenvectors, and study-specific covariates where warranted. For  
305 studies that included relatives, relatedness was accounted for in the regression modeling. See the  
306 **Supplementary Methods** for additional study-specific details.

307 GWAS results were combined using fixed-effect inverse variance-weighted meta-  
308 analyses in METAL.<sup>53</sup> Prior to performing meta-analyses, we applied genomic control to results  
309 from one study, deCODE, to adjust for inflation due to relatedness among participants ( $\lambda=1.12$ );  
310 all other studies had low inflation ( $\lambda=0.99-1.04$ ) (**Supplementary Table 1**). We removed  
311 SNPs/indels with minor allele frequency (MAF) <1% in the 1000G phase 3 reference panel for  
312 the analyzed ancestry group (1000G European or African superpopulations) and SNPs/indels  
313 available in only one study. All variant annotations correspond to the National Center for  
314 Biotechnology Information (NCBI) build 37. As before<sup>14</sup>, the threshold of genome-wide  
315 significance was set at  $P = 5 \times 10^{-8}$ . Regional association plots of novel genome-wide significant  
316 loci were constructed using LocusZoom<sup>54</sup> with references of either 1000G European or African  
317 panels to estimate linkage disequilibrium of the lead SNP (based on smallest meta-analysis P-  
318 value) and surrounding SNPs. The lead SNP for each novel locus was tested for association with  
319 each of the specific FTND items (**Supplementary Methods**).



320 For any ND-associated SNPs located within the bounds of loci identified by GSCAN (1  
321 MB surrounding the lead SNP),<sup>5</sup> conditional models were analyzed using our GWAS summary  
322 statistics and the Genome-wide Complex Trait Analysis (GCTA) tool, adjusted for the lead SNPs  
323 in GSCAN.<sup>55,56</sup> To contextualize the magnitude of the observed effect sizes, we calculated odds  
324 ratios (ORs) using the  $\beta$  estimate from the single SNP linear regression model ( $OR = \exp[2 \times \beta_{SNP}]$ )  
325 for severe vs. mild ND, with  $OR > 1$  corresponding to an increased risk of severe ND) and  
326 compared these values across studies and ancestries using the Forest Plot Viewer.<sup>57</sup>

### 327 *Independent testing using heaviness of smoking index in the UK Biobank*

328 Novel, genome-wide significant SNPs from our ND GWAS meta-analysis were tested in  
329 the UK Biobank. Although all 6 items of the FTND were not collected in the UK Biobank, two  
330 items (CPD and time-to-first-cigarette [TTFC]) were collected among current smokers. These  
331 two items together form the heaviness of smoking index (HSI), which is highly correlated with  
332 the full-scale FTND (e.g.,  $r = 0.7$  among nondaily smokers and  $0.9$  among daily smokers).<sup>58</sup> We  
333 derived HSI scores, ranging from 0 (no dependence) to 6 (highest dependence level), and  
334 categorized them as follows: mild (scores 0–2), moderate (scores 3–4), and severe (scores 5–6).  
335 These HSI categories were highly concordant (89.3%) with our routinely used FTND categories  
336 using the COGEN study, which was ascertained specifically for ND (**Supplementary**  
337 **Methods and Supplementary Table 2**). The final analysis dataset included 33,791 current  
338 smokers (18,063 mildly, 13,395 moderately, and 2,333 severely dependent, as defined by HSI).  
339 Our linear regression model included covariates for age, sex, and principal component  
340 eigenvectors (**Supplementary Methods**).

### 341 *Genetic correlations of ND with other complex phenotypes and with gene expression*

342 Summary statistics from the EUR-specific meta-analyses were used as input into linkage  
343 disequilibrium (LD) score regression (LDSC)<sup>18</sup> with reference to the 1000G EUR panel to  
344 estimate the SNP heritability ( $h_g^2$ ) of ND and its genetic correlations with 45 other complex  
345 phenotypes, including other smoking, drug, and alcohol use and dependence traits, smoking-  
346 related health consequences (e.g., cancer, COPD, and coronary heart disease), psychiatric and  
347 neurologic disorders, cognitive and educational traits, and brain volume metrics. The full list of  
348 phenotypes and GWAS datasets, as obtained from LD Hub<sup>59</sup> or shared by the original study  
349 investigators, are provided in **Supplementary Table 3**.

350 Similarly, EUR-specific GWAS meta-analysis summary statistics were input into  
351 stratified LDSC, as applied to specifically expressed genes (LDSC-SEG),<sup>21</sup> with reference to 205  
352 tissues and cell types from two sources—RNA-sequencing data on 53 tissues/cell types in the  
353 Genotype-Tissue Expression [GTEx (latest data available on version 7)] resource<sup>60</sup> and array-  
354 based data on 152 tissues/cell types made available in Gene Expression Omnibus<sup>61,62</sup> (see full list  
355 in **Supplementary Table 4**). Similarly to the initial application of LDSC-SEG,<sup>21</sup> these two  
356 sources were selected because their expression data included a wide range of ND-relevant and  
357 other tissues and cell types in humans, as opposed to focused information on a particular tissue.  
358 LDSC-SEG involved comparing expression of each gene in each tissue/cell type with that in  
359 other tissues/cell types, selecting the top 10% of differentially expressed genes, annotating SNPs  
360 from the GWAS summary statistics that lie within 100kb windows of the selected genes, and  
361 using the stratified LDSC method to estimate the enrichment in SNP heritability for ND for the  
362 given gene set compared to the baseline LDSC model with all genes. For each analysis, a  
363 Bonferroni correction was applied to assess statistical significance:  $P < 0.0011$  ( $\alpha = 0.05/45$   
364 phenotypes) for LDSC and  $P < 2.4 \times 10^{-4}$  ( $\alpha = 0.05/205$  tissues/cell types) for LDSC-SEG.

365 ***cis-eQTL assessment of novel ND-associated SNPs***

366 To assess evidence for SNP-gene associations, novel SNPs were queried against GTEx  
367 (version 8) *cis*-expression quantitative trait loci (*cis*-eQTL) results derived from SNP genotype  
368 and RNA-sequencing data across 44 tissues (N=126–209 for the 13 brain tissues).<sup>60</sup> The GTEx  
369 portal (<https://gtexportal.org/home/>) presents significant single-tissue *cis*-eQTLs, based on a  
370 false discovery rate (FDR) <5%.

371 We also assessed single-tissue *cis*-eQTL evidence from the BrainSeq consortium that  
372 includes larger sample sizes with SNP genotype and RNA-sequencing data available in two brain  
373 tissues, dorsolateral prefrontal cortex (N=453) and hippocampus (N=447).<sup>19</sup> Of the 551  
374 individuals with data available in at least one brain tissue, 286 were schizophrenia cases;  
375 case/control status was included as a covariate for adjustment in the *cis*-eQTL analysis, as  
376 described elsewhere.<sup>63</sup> Significant *cis*-eQTLs at FDR <10% are available at  
377 <http://eqtl.brainseq.org/phase2/eqtl/>.

378 **Data Availability**

379 The prior meta-analysis summary statistics<sup>14</sup> are available via dbGaP:  
380 [https://www.ncbi.nlm.nih.gov/projects/gap/cgi-bin/study.cgi?study\\_id=phs001532.v1.p1](https://www.ncbi.nlm.nih.gov/projects/gap/cgi-bin/study.cgi?study_id=phs001532.v1.p1). The  
381 summary statistics generated from the current study will be included under version 2 of this  
382 dbGaP study, or are available upon request to the corresponding author (D.B.H.).

383 **Conflicts of Interest**

384 L.J.B. and the spouse of N.L.S. are listed as inventors on U.S. Patent 8,080,371, ‘Markers  
385 for Addiction’ covering the use of certain SNPs in determining the diagnosis, prognosis and  
386 treatment of addiction. Y.G. is an employee of GeneCentric Therapeutics. Although unrelated to  
387 this research, H.R.K. has been a consultant or advisory board member for Lundbeck and Indivior

388 and is a member of the American Society of Clinical Psychopharmacology's Alcohol Clinical  
389 Trials Initiative, which was supported in the last 3 years by AbbVie, Alkermes, Ethypharm,  
390 Indivior, Lilly, Lundbeck, Otsuka, Pfizer, Arbor and Amygdala Neurosciences. H.R.K. and J.G.  
391 are named as inventors on PCT patent application #15/878,640 entitled: "Genotype-guided  
392 dosing of opioid agonists," filed January 24, 2018. J.K. consulted for Pfizer in 2012–2015 on  
393 ND. All other authors declare no conflict of interest.

### 394 **Acknowledgements**

395 We are grateful to the many study participants, who made this work possible. The meta-  
396 analysis was supported by the National Institute on Drug Abuse grant numbers R01 DA042090  
397 (PI: DBH) and R01 DA036583 (PI: LJB). The authors thank deCODE Genetics / Amgen and its  
398 investigators (Gunnar W. Reginsson, Thorgeir E. Thorgeirsson, and Kari Stefansson) for  
399 contributing and analyzing their data for inclusion in the meta-analysis. Their work was  
400 supported in part by NIDA R01 DA017932 (PI: Kari Stefansson). Acknowledgments for all  
401 other ND studies, contributed by the authors and/or made publicly available, are included in the  
402 Supplementary Information. This research also leveraged the UK Biobank Resource under  
403 Application Number 24603.

404

### 405 **References**

- 406 1. Organization, W.H. WHO report on the global tobacco epidemic, 2017: monitoring tobacco use  
407 and prevention policies. (Geneva, 2017).
- 408 2. Services, U.S.D.o.H.a.H. *The Health Consequences of Smoking-50 Years of Progress: A Report of*  
409 *the Surgeon General*, (Atlanta (GA), 2014).
- 410 3. Sullivan, P.F. & Kendler, K.S. The genetic epidemiology of smoking. *Nicotine Tob Res* **1 Suppl 2**,  
411 S51-7; discussion S69-70 (1999).
- 412 4. Agrawal, A. *et al.* The genetics of addiction-a translational perspective. *Transl Psychiatry* **2**, e140  
413 (2012).
- 414 5. Liu, M. *et al.* Association studies of up to 1.2 million individuals yield new insights into the  
415 genetic etiology of tobacco and alcohol use. *Nat Genet* **51**, 237-244 (2019).

- 416 6. Hancock, D.B., Markunas, C.A., Bierut, L.J. & Johnson, E.O. Human Genetics of Addiction: New  
417 Insights and Future Directions. *Curr Psychiatry Rep* **20**, 8 (2018).
- 418 7. Baker, T.B. *et al.* Are tobacco dependence and withdrawal related amongst heavy smokers?  
419 Relevance to conceptualizations of dependence. *J Abnorm Psychol* **121**, 909-21 (2012).
- 420 8. Zelman, D.C., Brandon, T.H., Jorenby, D.E. & Baker, T.B. Measures of affect and nicotine  
421 dependence predict differential response to smoking cessation treatments. *J Consult Clin*  
422 *Psychol* **60**, 943-52 (1992).
- 423 9. Gu, F. *et al.* Time to smoke first morning cigarette and lung cancer in a case-control study. *J Natl*  
424 *Cancer Inst* **106**, dju118 (2014).
- 425 10. Guertin, K.A. *et al.* Time to First Morning Cigarette and Risk of Chronic Obstructive Pulmonary  
426 Disease: Smokers in the PLCO Cancer Screening Trial. *PLoS One* **10**, e0125973 (2015).
- 427 11. Fagerstrom, K. Determinants of tobacco use and renaming the FTND to the Fagerstrom Test for  
428 Cigarette Dependence. *Nicotine Tob Res* **14**, 75-8 (2012).
- 429 12. Heatherton, T.F., Kozlowski, L.T., Frecker, R.C. & Fagerstrom, K.O. The Fagerstrom Test for  
430 Nicotine Dependence: a revision of the Fagerstrom Tolerance Questionnaire. *Br J Addict* **86**,  
431 1119-27 (1991).
- 432 13. Hancock, D.B. *et al.* Genome-wide meta-analysis reveals common splice site acceptor variant in  
433 CHRNA4 associated with nicotine dependence. *Transl Psychiatry* **5**, e651 (2015).
- 434 14. Hancock, D.B. *et al.* Genome-wide association study across European and African American  
435 ancestries identifies a SNP in DNMT3B contributing to nicotine dependence. *Mol Psychiatry* **23**,  
436 1911-1919 (2018).
- 437 15. Thorgeirsson, T.E. *et al.* A variant associated with nicotine dependence, lung cancer and  
438 peripheral arterial disease. *Nature* **452**, 638-42 (2008).
- 439 16. Bierut, L.J. *et al.* Variants in nicotinic receptors and risk for nicotine dependence. *Am J Psychiatry*  
440 **165**, 1163-71 (2008).
- 441 17. Huedo-Medina, T.B., Sanchez-Meca, J., Marin-Martinez, F. & Botella, J. Assessing heterogeneity  
442 in meta-analysis: Q statistic or I2 index? *Psychol Methods* **11**, 193-206 (2006).
- 443 18. Bulik-Sullivan, B. *et al.* An atlas of genetic correlations across human diseases and traits. *Nat*  
444 *Genet* **47**, 1236-41 (2015).
- 445 19. BrainSeq, A.H.B.G.C.E.a.d.l.o. & BrainSeq, A.H.B.G.C. BrainSeq: Neurogenomics to Drive Novel  
446 Target Discovery for Neuropsychiatric Disorders. *Neuron* **88**, 1078-1083 (2015).
- 447 20. Ward, L.D. & Kellis, M. HaploReg: a resource for exploring chromatin states, conservation, and  
448 regulatory motif alterations within sets of genetically linked variants. *Nucleic Acids Res* **40**, D930-  
449 4 (2012).
- 450 21. Finucane, H.K. *et al.* Heritability enrichment of specifically expressed genes identifies disease-  
451 relevant tissues and cell types. *Nat Genet* **50**, 621-629 (2018).
- 452 22. Wain, L.V. *et al.* Novel insights into the genetics of smoking behaviour, lung function, and  
453 chronic obstructive pulmonary disease (UK BiLEVE): a genetic association study in UK Biobank.  
454 *Lancet Respir Med* **3**, 769-781 (2015).
- 455 23. Chen, X.D., Zhu, M.X. & Wang, S.J. Expression of long non-coding RNA MAGI2AS3 in human  
456 gliomas and its prognostic significance. *Eur Rev Med Pharmacol Sci* **23**, 3455-3460 (2019).
- 457 24. Silva, J.P. *et al.* Latrophilin 1 and its endogenous ligand Lasso/teneurin-2 form a high-affinity  
458 transsynaptic receptor pair with signaling capabilities. *Proc Natl Acad Sci U S A* **108**, 12113-8  
459 (2011).
- 460 25. Kerin, T. *et al.* A noncoding RNA antisense to moesin at 5p14.1 in autism. *Sci Transl Med* **4**,  
461 128ra40 (2012).
- 462 26. Piper, M.E. *et al.* Refining the tobacco dependence phenotype using the Wisconsin Inventory of  
463 Smoking Dependence Motives. *J Abnorm Psychol* **117**, 747-61 (2008).

- 464 27. Piasecki, T.M., Piper, M.E. & Baker, T.B. Refining the tobacco dependence phenotype using the  
465 Wisconsin Inventory of Smoking Dependence Motives: II. Evidence from a laboratory self-  
466 administration assay. *J Abnorm Psychol* **119**, 513-23 (2010).
- 467 28. Piasecki, T.M., Piper, M.E. & Baker, T.B. Tobacco Dependence: Insights from Investigations of  
468 Self-Reported Smoking Motives. *Curr Dir Psychol Sci* **19**, 395-401 (2010).
- 469 29. Piasecki, T.M., Piper, M.E., Baker, T.B. & Hunt-Carter, E.E. WISDM primary and secondary  
470 dependence motives: associations with self-monitored motives for smoking in two college  
471 samples. *Drug Alcohol Depend* **114**, 207-16 (2011).
- 472 30. Welter, D. *et al.* The NHGRI GWAS Catalog, a curated resource of SNP-trait associations. *Nucleic  
473 Acids Res* **42**, D1001-6 (2014).
- 474 31. Lee, J.J. *et al.* Gene discovery and polygenic prediction from a genome-wide association study of  
475 educational attainment in 1.1 million individuals. *Nat Genet* **50**, 1112-1121 (2018).
- 476 32. Karlsson Linner, R. *et al.* Genome-wide association analyses of risk tolerance and risky behaviors  
477 in over 1 million individuals identify hundreds of loci and shared genetic influences. *Nat Genet*  
478 **51**, 245-257 (2019).
- 479 33. Erzurumluoglu, A.M. *et al.* Meta-analysis of up to 622,409 individuals identifies 40 novel  
480 smoking behaviour associated genetic loci. *Mol Psychiatry* (2019).
- 481 34. Kichaev, G. *et al.* Leveraging Polygenic Functional Enrichment to Improve GWAS Power. *Am J  
482 Hum Genet* **104**, 65-75 (2019).
- 483 35. Lutz, S.M. *et al.* A genome-wide association study identifies risk loci for spirometric measures  
484 among smokers of European and African ancestry. *BMC Genet* **16**, 138 (2015).
- 485 36. Nagel, M. *et al.* Meta-analysis of genome-wide association studies for neuroticism in 449,484  
486 individuals identifies novel genetic loci and pathways. *Nat Genet* **50**, 920-927 (2018).
- 487 37. Wray, N.R. *et al.* Genome-wide association analyses identify 44 risk variants and refine the  
488 genetic architecture of major depression. *Nat Genet* **50**, 668-681 (2018).
- 489 38. Perry, J.R. *et al.* Parent-of-origin-specific allelic associations among 106 genomic loci for age at  
490 menarche. *Nature* **514**, 92-97 (2014).
- 491 39. Day, F.R., Ong, K.K. & Perry, J.R.B. Elucidating the genetic basis of social interaction and  
492 isolation. *Nat Commun* **9**, 2457 (2018).
- 493 40. Walters, R.K. *et al.* Transancestral GWAS of alcohol dependence reveals common genetic  
494 underpinnings with psychiatric disorders. *Nat Neurosci* **21**, 1656-1669 (2018).
- 495 41. Kranzler, H.R. *et al.* Genome-wide association study of alcohol consumption and use disorder in  
496 274,424 individuals from multiple populations. *Nat Commun* **10**, 1499 (2019).
- 497 42. Reginsson, G.W. *et al.* Polygenic risk scores for schizophrenia and bipolar disorder associate with  
498 addiction. *Addict Biol* (2017).
- 499 43. Hartz, S.M. *et al.* Genetic correlation between smoking behaviors and schizophrenia. *Schizophr  
500 Res* (2017).
- 501 44. McKay, J.D. *et al.* Large-scale association analysis identifies new lung cancer susceptibility loci  
502 and heterogeneity in genetic susceptibility across histological subtypes. *Nat Genet* **49**, 1126-  
503 1132 (2017).
- 504 45. Moulton, E.A., Elman, I., Becerra, L.R., Goldstein, R.Z. & Borsook, D. The cerebellum and  
505 addiction: insights gained from neuroimaging research. *Addict Biol* **19**, 317-31 (2014).
- 506 46. Miquel, M. *et al.* Have we been ignoring the elephant in the room? Seven arguments for  
507 considering the cerebellum as part of addiction circuitry. *Neurosci Biobehav Rev* **60**, 1-11 (2016).
- 508 47. Herculano-Houzel, S. & Lent, R. Isotropic fractionator: a simple, rapid method for the  
509 quantification of total cell and neuron numbers in the brain. *J Neurosci* **25**, 2518-21 (2005).
- 510 48. Timofeeva, M.N. *et al.* Genetic polymorphisms in 15q25 and 19q13 loci, cotinine levels, and risk  
511 of lung cancer in EPIC. *Cancer Epidemiol Biomarkers Prev* **20**, 2250-61 (2011).

- 512 49. Martin, J., Taylor, M.J. & Lichtenstein, P. Assessing the evidence for shared genetic risks across  
513 psychiatric disorders and traits. *Psychol Med* **48**, 1759-1774 (2018).
- 514 50. Hjelmborg, J. *et al.* Lung cancer, genetic predisposition and smoking: the Nordic Twin Study of  
515 Cancer. *Thorax* **72**, 1021-1027 (2017).
- 516 51. Conway, K.P. *et al.* Data compatibility in the addiction sciences: an examination of measure  
517 commonality. *Drug Alcohol Depend* **141**, 153-8 (2014).
- 518 52. Glasheen, C. *et al.* Is the Fagerstrom test for nicotine dependence invariant across secular trends  
519 in smoking? A question for cross-birth cohort analysis of nicotine dependence. *Drug Alcohol*  
520 *Depend* **185**, 127-132 (2018).
- 521 53. Willer, C.J., Li, Y. & Abecasis, G.R. METAL: fast and efficient meta-analysis of genomewide  
522 association scans. *Bioinformatics* **26**, 2190-1 (2010).
- 523 54. Pruim, R.J. *et al.* LocusZoom: regional visualization of genome-wide association scan results.  
524 *Bioinformatics* **26**, 2336-7 (2010).
- 525 55. Yang, J., Lee, S.H., Goddard, M.E. & Visscher, P.M. GCTA: a tool for genome-wide complex trait  
526 analysis. *Am J Hum Genet* **88**, 76-82 (2011).
- 527 56. Yang, J. *et al.* Conditional and joint multiple-SNP analysis of GWAS summary statistics identifies  
528 additional variants influencing complex traits. *Nat Genet* **44**, 369-75, S1-3 (2012).
- 529 57. Boyles, A.L., Harris, S.F., Rooney, A.A. & Thayer, K.A. Forest Plot Viewer: a new graphing tool.  
530 *Epidemiology* **22**, 746-7 (2011).
- 531 58. DiFranza, J.R. *et al.* What aspect of dependence does the fagerstrom test for nicotine  
532 dependence measure? *ISRN Addict* **2013**, 906276 (2013).
- 533 59. Zheng, J. *et al.* LD Hub: a centralized database and web interface to perform LD score regression  
534 that maximizes the potential of summary level GWAS data for SNP heritability and genetic  
535 correlation analysis. *Bioinformatics* **33**, 272-279 (2017).
- 536 60. Consortium, G.T. *et al.* Genetic effects on gene expression across human tissues. *Nature* **550**,  
537 204-213 (2017).
- 538 61. Pers, T.H. *et al.* Biological interpretation of genome-wide association studies using predicted  
539 gene functions. *Nat Commun* **6**, 5890 (2015).
- 540 62. Fehrmann, R.S. *et al.* Gene expression analysis identifies global gene dosage sensitivity in cancer.  
541 *Nat Genet* **47**, 115-25 (2015).
- 542 63. Collado-Torres, L. *et al.* Regional Heterogeneity in Gene Expression, Regulation, and Coherence  
543 in the Frontal Cortex and Hippocampus across Development and Schizophrenia. *Neuron* **103**,  
544 203-216 e8 (2019).

545

**Table 1.** Lead single nucleotide polymorphism (SNP) associations from the five genome-wide significant loci in the Nicotine Dependence GenOmics (iNDiGO) consortium cross-ancestry meta-analysis for nicotine dependence (ND). Ancestry-specific association results are also presented.

| SNP (effect allele)                                   | Chr:position (NCBI build 37) | Gene / closest genes        | European ancestry-specific ND meta-analysis (total N = 46,213) |                 |                      | African American-specific ND meta-analysis (total N = 11,787) |                 |                      | Cross-ancestry ND meta-analysis (total N = 58,000) |                      |
|-------------------------------------------------------|------------------------------|-----------------------------|----------------------------------------------------------------|-----------------|----------------------|---------------------------------------------------------------|-----------------|----------------------|----------------------------------------------------|----------------------|
|                                                       |                              |                             | Effect allele freq. <sup>a</sup>                               | $\beta$ (SE)    | P                    | Effect allele freq. <sup>a</sup>                              | $\beta$ (SE)    | P                    | $\beta$ (SE)                                       | P                    |
| <b><u>Lead SNPs from novel ND-associated loci</u></b> |                              |                             |                                                                |                 |                      |                                                               |                 |                      |                                                    |                      |
| rs1862416 (T)                                         | 5:167,394,595                | <i>TENM2</i>                | 0.88                                                           | 0.037 (0.0074)  | $5.4 \times 10^{-7}$ | 0.94                                                          | 0.049 (0.0066)  | $6.6 \times 10^{-3}$ | 0.039 (0.0068)                                     | $1.5 \times 10^{-8}$ |
| rs2714700 (T)                                         | 7:79,367,667                 | <i>MAGI2</i> / <i>GNAII</i> | 0.47                                                           | -0.022 (0.0045) | $1.2 \times 10^{-6}$ | 0.72                                                          | -0.026 (0.0094) | $5.5 \times 10^{-3}$ | -0.023 (0.0041)                                    | $2.3 \times 10^{-8}$ |
| <b><u>Lead SNPs from known ND-associated loci</u></b> |                              |                             |                                                                |                 |                      |                                                               |                 |                      |                                                    |                      |



|                    |               |               |      |                    |                       |      |                   |                      |                   |                       |
|--------------------|---------------|---------------|------|--------------------|-----------------------|------|-------------------|----------------------|-------------------|-----------------------|
| rs13284520<br>(A)  | 9:136,502,572 | <i>DBH</i>    | 0.83 | 0.028<br>(0.0059)  | $1.7 \times 10^{-6}$  | 0.56 | 0.029<br>(0.0092) | $1.7 \times 10^{-3}$ | 0.029<br>(0.0050) | $1.1 \times 10^{-8}$  |
| rs16969968<br>(A)  | 15:78,882,925 | <i>CHRNA5</i> | 0.37 | 0.061<br>(0.0047)  | $4.9 \times 10^{-38}$ | 0.02 | 0.049<br>(0.018)  | $7.1 \times 10^{-3}$ | 0.060<br>(0.0046) | $1.6 \times 10^{-39}$ |
| rs151176846<br>(T) | 20:61,997,500 | <i>CHRNA4</i> | 0.92 | -0.067<br>(0.0094) | $1.2 \times 10^{-12}$ | 1.00 | NA                | NA                   | 0.067<br>(0.0094) | $1.2 \times 10^{-12}$ |

Abbreviations: NA, not available (due to monomorphism for rs151176846 among African Americans); NCBI, National Center for Biotechnology Information; SE, standard error.

<sup>a</sup> Frequencies correspond to 1000G European and African superpopulation reference panels.

**Table 2.** Single nucleotide polymorphisms (SNPs) identified as genome-wide significant for cigarettes per day (CPD) by the GWAS and Sequencing Consortium of Alcohol and Nicotine use (GSCAN) consortium and associated with nicotine dependence (ND) at  $P < 9.1 \times 10^{-4}$  ( $\alpha = 0.05/55$  tests) in the cross-ancestry meta-analysis by the Nicotine Dependence GenOmics (iNDiGO) consortium. Results are sorted by novelty and then by iNDiGO p-values, and  $\beta$  values correspond to direction of association for the effect alleles.

| SNP (effect allele)                                           | Chr:position<br>(NCBI build<br>37) | Gene / nearest gene(s) | GSCAN consortium meta-<br>analysis for CPD<br>(N=330,721) |        |                        | iNDiGO consortium meta-<br>analysis for ND (N=58,000) |        |                       |
|---------------------------------------------------------------|------------------------------------|------------------------|-----------------------------------------------------------|--------|------------------------|-------------------------------------------------------|--------|-----------------------|
|                                                               |                                    |                        | $\beta$                                                   | SE     | P                      | $\beta$                                               | SE     | P                     |
| <b><u>SNPs from loci not reported by prior GWAS of ND</u></b> |                                    |                        |                                                           |        |                        |                                                       |        |                       |
| rs7125588 (G)                                                 | 11:113,436,072                     | <i>DRD2 / TMPRSS5</i>  | -0.014                                                    | 0.0020 | $6.5 \times 10^{-12}$  | -0.016                                                | 0.0042 | $1.8 \times 10^{-4}$  |
| rs1592485 (A)                                                 | 16:52,093,549                      | <i>C16orf97</i>        | -0.013                                                    | 0.0021 | $1.1 \times 10^{-10}$  | -0.015                                                | 0.0043 | $4.5 \times 10^{-4}$  |
| rs2072659 (G)                                                 | 1:154,548,521                      | <i>CHRNA2</i>          | -0.025                                                    | 0.0038 | $2.5 \times 10^{-13}$  | -0.026                                                | 0.0078 | $8.4 \times 10^{-4}$  |
| <b><u>SNPs from loci reported by prior GWAS of ND</u></b>     |                                    |                        |                                                           |        |                        |                                                       |        |                       |
| rs146009840 (T)                                               | 15:78,906,177                      | <i>CHRNA3</i>          | 0.030                                                     | 0.0036 | $2.0 \times 10^{-17}$  | 0.060                                                 | 0.0046 | $2.6 \times 10^{-39}$ |
| rs72740955 (T)                                                | 15:78,849,779                      | <i>PSMA4 / CHRNA5</i>  | 0.040                                                     | 0.0033 | $2.4 \times 10^{-34}$  | 0.058                                                 | 0.0045 | $1.5 \times 10^{-38}$ |
| rs10519203 (A)                                                | 15:78,814,046                      | <i>HYKK</i>            | -0.075                                                    | 0.0021 | $3.1 \times 10^{-286}$ | -0.050                                                | 0.0042 | $7.7 \times 10^{-32}$ |

|                |               |                      |        |        |                       |        |        |                       |
|----------------|---------------|----------------------|--------|--------|-----------------------|--------|--------|-----------------------|
| rs8040868 (C)  | 15:78,911,181 | <i>CHRNA3</i>        | 0.022  | 0.0034 | $1.8 \times 10^{-10}$ | 0.044  | 0.0041 | $7.3 \times 10^{-27}$ |
| rs12438181 (A) | 15:78,812,098 | <i>HYKK</i>          | -0.023 | 0.0037 | $5.0 \times 10^{-10}$ | -0.039 | 0.0049 | $2.6 \times 10^{-15}$ |
| rs3743063 (C)  | 15:79,065,171 | <i>ADAMTS7</i>       | -0.023 | 0.0035 | $1.5 \times 10^{-11}$ | -0.030 | 0.0042 | $6.8 \times 10^{-13}$ |
| rs28681284 (T) | 15:78,908,565 | <i>CHRNA3</i>        | -0.049 | 0.0030 | $2.1 \times 10^{-58}$ | -0.035 | 0.0051 | $1.1 \times 10^{-11}$ |
| rs2273500 (C)  | 20:61,986,949 | <i>CHRNA4</i>        | 0.031  | 0.0029 | $3.5 \times 10^{-26}$ | 0.034  | 0.0058 | $4.0 \times 10^{-9}$  |
| rs3025383 (C)  | 9:136,502,369 | <i>DBH</i>           | -0.026 | 0.0026 | $9.8 \times 10^{-24}$ | -0.025 | 0.0049 | $1.8 \times 10^{-7}$  |
| rs28438420 (T) | 15:78,836,288 | <i>PSMA4</i>         | 0.020  | 0.0028 | $1.3 \times 10^{-12}$ | 0.020  | 0.0041 | $7.9 \times 10^{-7}$  |
| rs75596189 (T) | 9:136,468,701 | <i>FAM163B / DBH</i> | 0.035  | 0.0037 | $1.8 \times 10^{-20}$ | 0.030  | 0.0066 | $8.1 \times 10^{-6}$  |
| rs4236926 (G)  | 8:42,578,059  | <i>CHRNA3</i>        | 0.028  | 0.0024 | $7.7 \times 10^{-33}$ | 0.021  | 0.0048 | $1.6 \times 10^{-5}$  |
| rs56113850 (C) | 19:41,353,107 | <i>CYP2A6</i>        | 0.043  | 0.0021 | $4.0 \times 10^{-99}$ | 0.018  | 0.0042 | $2.1 \times 10^{-5}$  |
| rs1737894 (G)  | 20:31,054,702 | <i>NOLAL</i>         | 0.014  | 0.0021 | $9.9 \times 10^{-12}$ | 0.017  | 0.0043 | $1.1 \times 10^{-4}$  |

Abbreviations: NCBI, National Center for Biotechnology Information; SE, standard error.

**Figure 1.** Cross-ancestry nicotine dependence genome-wide association meta-analysis results, comprising 23 iNDiGO studies with total N = 58,000 European and African American ancestry ever smokers. The  $-\log_{10}$  meta-analysis p-values of single nucleotide polymorphisms (SNPs; depicted as circles) and insertions/deletions (indels; depicted as triangles) are plotted by chromosomal position. Five loci surpassed the genome-wide statistical significance threshold ( $P < 5 \times 10^{-8}$ , as marked by the solid horizontal black line).

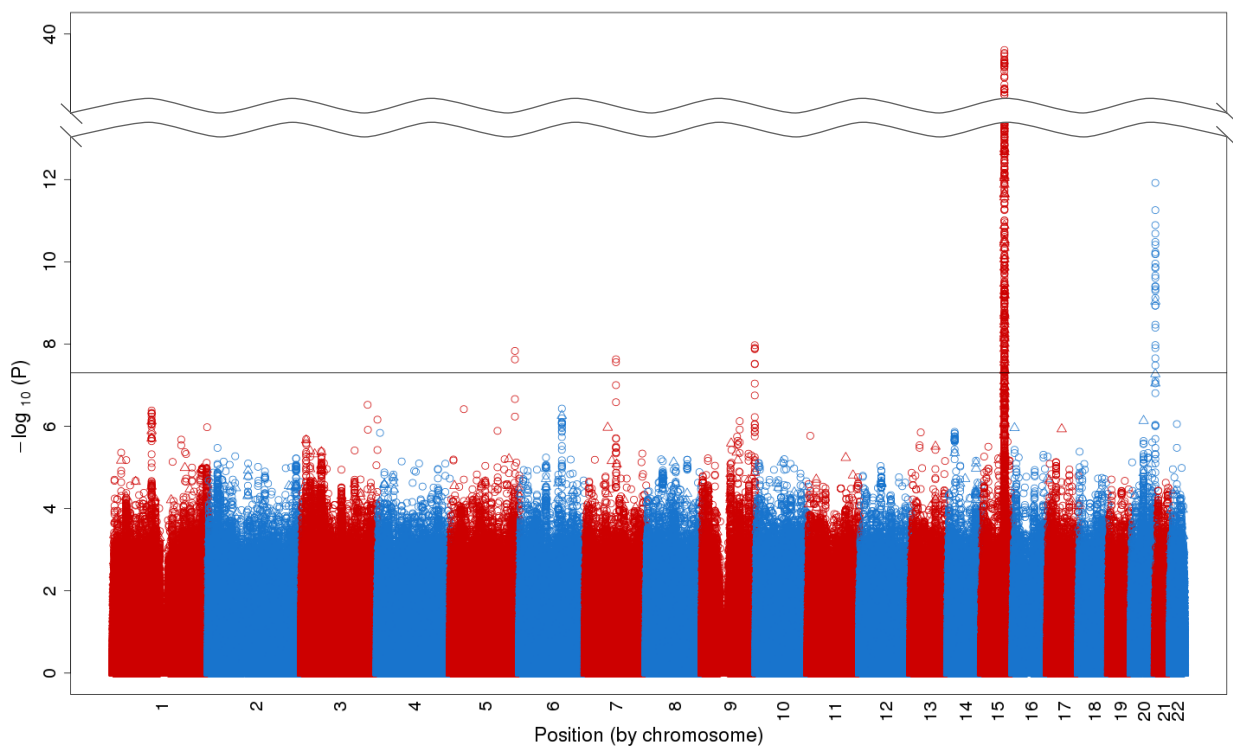

**Figure 2. Associations of novel single nucleotide polymorphisms (SNPs) with specific items of the Fagerström Test for Nicotine Dependence (FTND) across the iNDiGO studies.**

Associations are presented from cross-ancestry meta-analyses of the (A) *MAGI2/GNAII* SNP allele rs2714700-T and (B) *TENM2* SNP allele rs1862416-T. Beta ( $\beta$ ) and corresponding 95% confidence interval (CI) estimates were taken from linear regression models for categorical FTND item responses (1 and 4, closed diamonds) or logistic regression models for binary FTND item responses (2, 3, 5, and 6, open diamonds).

(A)

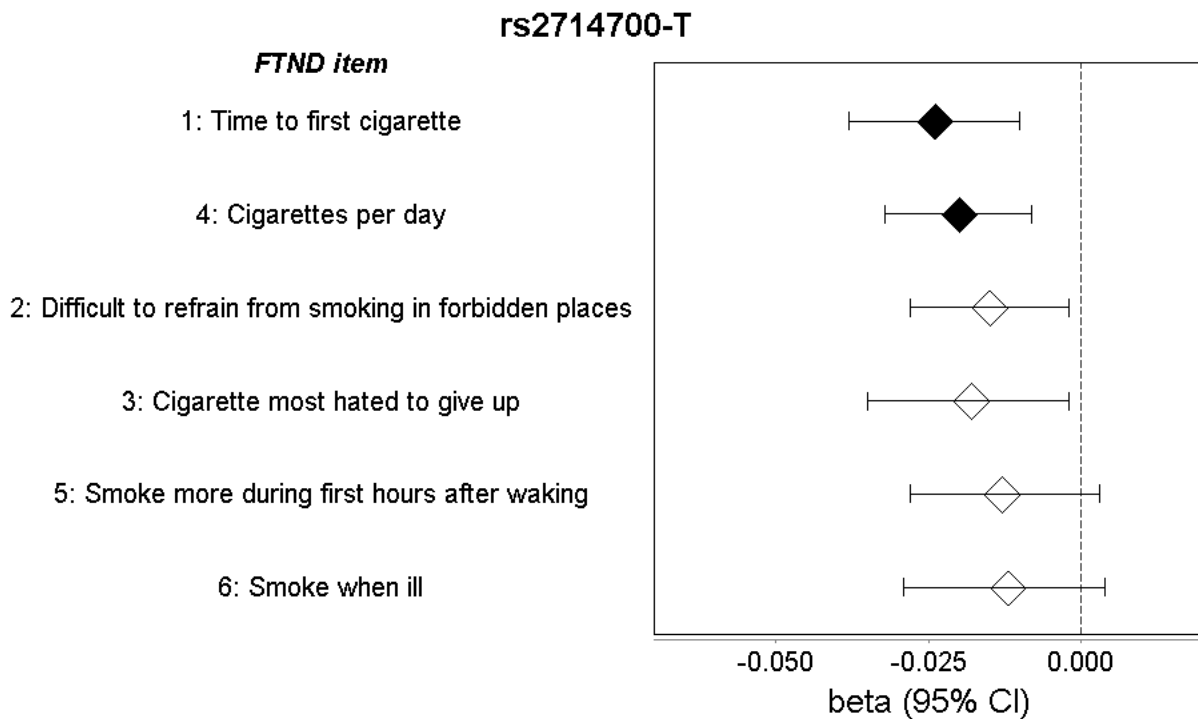

(B)

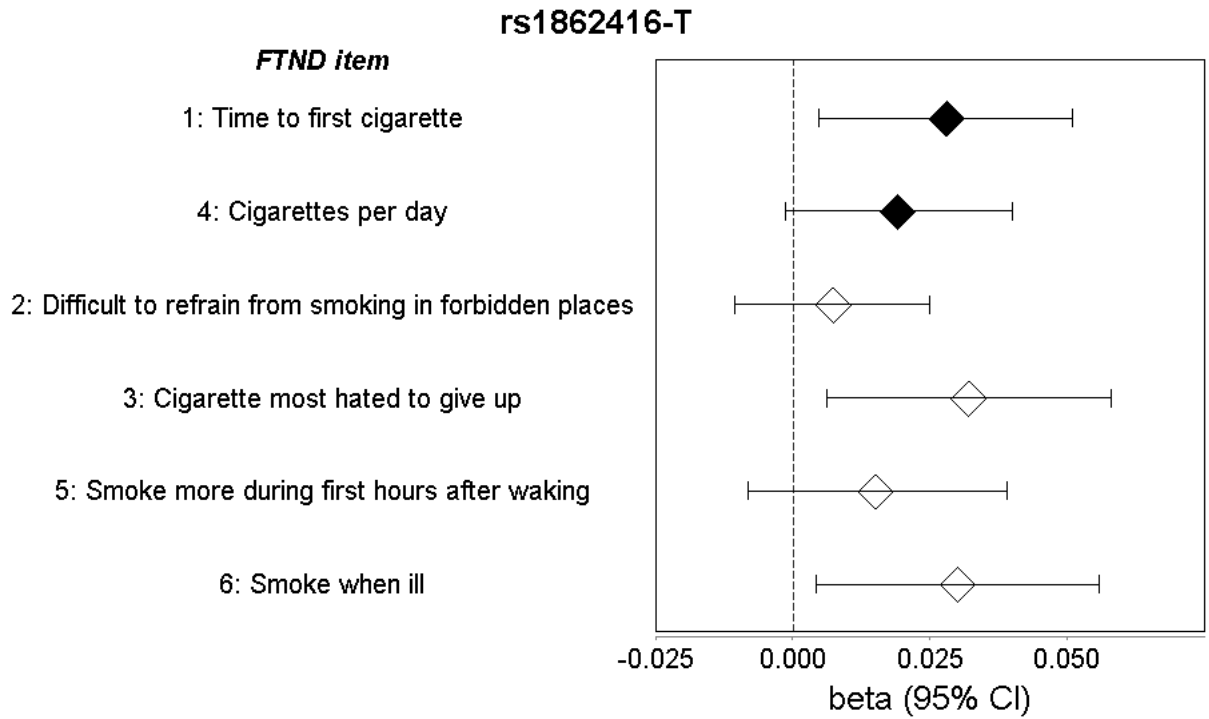

### Figure 3. Genetic correlations of nicotine dependence (ND) with 45 other phenotypes.

Correlations were calculated using linkage disequilibrium (LD) score regression with the iNDiGO European ancestry-specific GWAS meta-analysis results for ND (N=46,213), compared with results made available via LD Hub or study investigators (see Supplementary Table 3 for original references). Phenotypes were grouped by disease/trait or measurement category, as indicated by different colorings. Point estimates equate to genetic correlation ( $r_g$ ) values; error bars show the 95% confidence intervals; and the dotted vertical grey line corresponds to  $r_g=0$  (no correlation with ND). Phenotypes with significant correlations ( $P<0.0011$ ,  $\alpha=0.05/45$  tested) are bolded.

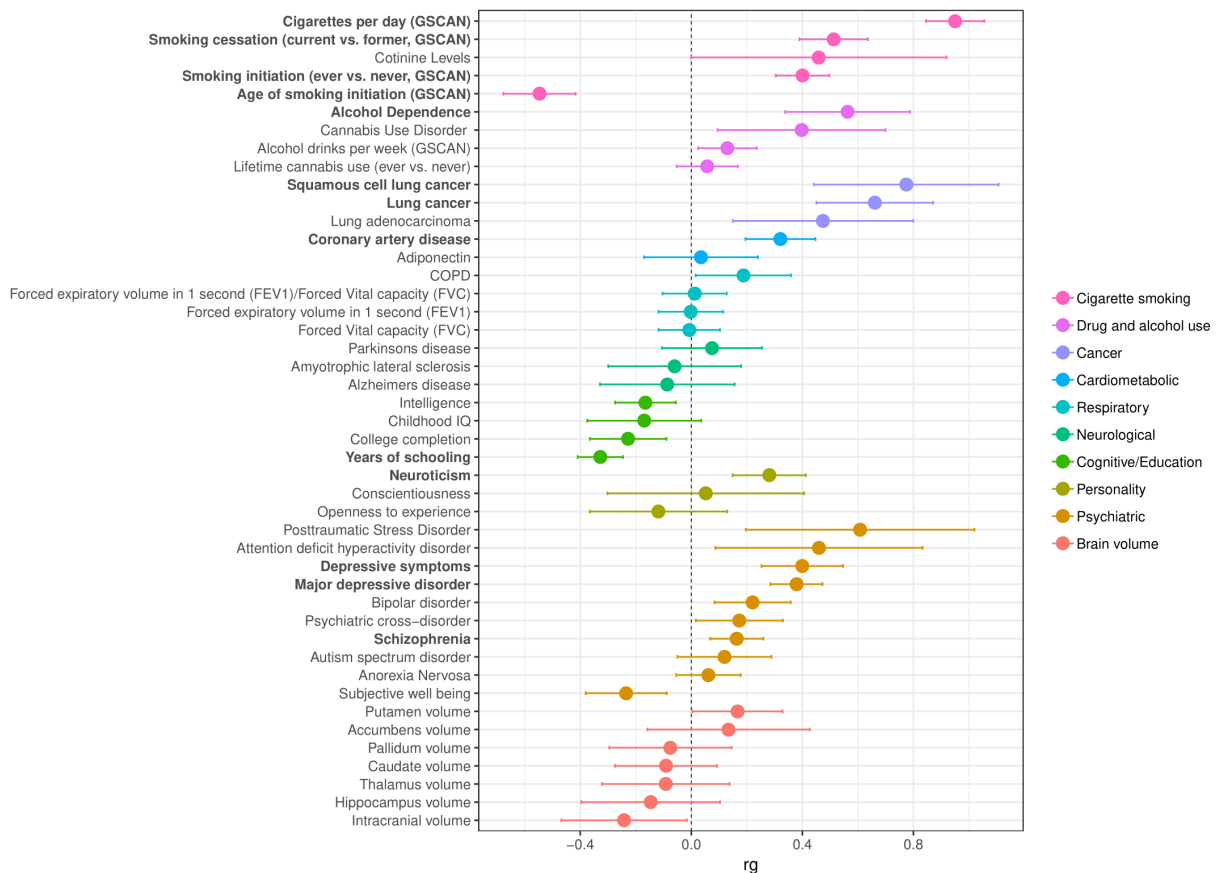

Source: https://www.biorxiv.org/content/10.1101/2020.01.15.898858v1.full.pdf
