## Expanding the Genetic Architecture of Nicotine Dependence and its Shared Genetics with Multiple Traits: Findings from the Nicotine Dependence GenOmics (iNDiGO) Consortium

Bryan C. Quach<sup>1</sup>, Michael J. Bray<sup>2</sup>, Nathan C. Gaddis<sup>1</sup>, Mengzhen Liu<sup>3</sup>, Teemu Palviainen<sup>4</sup>, Camelia C. Minica<sup>5</sup>, Stephanie Zellers<sup>3</sup>, Richard Sherva<sup>6</sup>, Fazil Aliev<sup>7,8</sup>, Michael Nothnagel<sup>9,10</sup>, Kendra A. Young<sup>11</sup>, Jesse A. Marks<sup>1</sup>, Hannah Young<sup>3</sup>, Megan U. Carnes<sup>1</sup>, Yuelong Guo<sup>1,12</sup>, Alex Waldrop<sup>1</sup>, Nancy Y.A. Sey<sup>13</sup>, Maria T. Landi<sup>14</sup>, Daniel W. McNeil<sup>15,16</sup>, Dmitriy Drichel<sup>9,10</sup>, Lindsay A. Farrer<sup>6,17,18,19,20</sup>, Christina A. Markunas<sup>1</sup>, Jacqueline M. Vink<sup>21</sup>, Jouke-Jan Hottenga<sup>5</sup>, William G. Iacono<sup>3</sup>, Henry R. Kranzler<sup>22,23</sup>, Nancy L. Saccone<sup>24,25</sup>, Michael C. Neale<sup>26,27</sup>, Pamela Madden<sup>2</sup>, Marcella Rietschel<sup>28</sup>, Mary L. Marazita<sup>29</sup>, Matthew McGue<sup>3</sup>, Hyejung Won<sup>13</sup>, Georg Winterer and the German Nicotine Cohort Study<sup>30</sup>, Richard Grucza<sup>31</sup>, Danielle M. Dick<sup>7,32,33</sup>, Joel Gelernter<sup>34,35,36,37</sup>, Neil E. Caporaso<sup>38</sup>, Timothy B. Baker<sup>39</sup>, Dorret I. Boomsma<sup>5</sup>, Jaakko Kaprio<sup>4,40</sup>, John E. Hokanson<sup>11</sup>, Scott Vrieze<sup>3</sup>, Laura J. Bierut<sup>2</sup>, Eric O. Johnson<sup>1,41</sup>, and Dana B. Hancock<sup>1</sup>

1. GenOmics, Bioinformatics, and Translational Research Center, Biostatistics and Epidemiology Division, RTI International, Research Triangle Park, North Carolina, USA;
2. Department of Psychiatry, Washington University, St. Louis, Missouri, USA;
3. Department of Psychology, University of Minnesota Twin Cities, Minneapolis, Minnesota, USA;
4. Institute for Molecular Medicine Finland (FIMM), University of Helsinki, Helsinki, Finland;
5. Department of Biological Psychology, Vrije Universiteit, Amsterdam, The Netherlands;
6. Department of Medicine (Biomedical Genetics), Boston University School of Medicine, Boston, Massachusetts, USA;
7. Department of Psychology, Virginia Commonwealth University, Richmond, Virginia, USA;
8. Faculty of Business, Karabuk University, Turkey;
9. Cologne Center for Genomics, University of Cologne, Cologne, Germany
10. University Hospital Cologne, Cologne, Germany
11. Department of Epidemiology, University of Colorado Anschutz Medical Campus, Aurora, Colorado, USA;
12. GeneCentric Therapeutics, Research Triangle Park, North Carolina, USA;
13. Department of Genetics, University of North Carolina at Chapel Hill, Chapel Hill, North Carolina, USA;
14. Genetic Epidemiology Branch, Division of Cancer Epidemiology and Genetics, National Cancer Institute, National Institutes of Health, United States department of Health and Human Services, Bethesda, Maryland, USA;
15. Department of Psychology, West Virginia University, Morgantown, West Virginia, USA;
16. Department of Dental Practice and Rural Health, West Virginia University, Morgantown, West Virginia, USA;

17. Department of Neurology, Boston University School of Medicine, Boston, Massachusetts, USA;
18. Department of Ophthalmology, Boston University School of Medicine, Boston, Massachusetts, USA;
19. Department of Epidemiology, Boston University School of Public Health, Boston, Massachusetts, USA;
20. Department of Biostatistics, Boston University School of Public Health, Boston, Massachusetts, USA;
21. Behavioural Science Institute, Radboud University, Nijmegen, The Netherlands;
22. Department of Psychiatry, University of Pennsylvania Perelman School of Medicine, Philadelphia, Pennsylvania, USA;
23. VISN 4 MIRECC, Crescenz VA Medical Center, Philadelphia, Pennsylvania, USA;
24. Department of Genetics, Washington University, St. Louis, Missouri, USA;
25. Division of Biostatistics, Washington University, St. Louis, Missouri, USA
26. Virginia Institute for Psychiatric and Behavioral Genetics, Virginia Commonwealth University, Richmond, Virginia, USA;
27. Department of Psychiatry, Virginia Commonwealth University, Richmond, Virginia, USA;
28. Department of Genetic Epidemiology in Psychiatry, Central Institute of Mental Health, Medical Faculty Mannheim, University of Heidelberg, Mannheim, Germany;
29. Center for Craniofacial and Dental Genetics, Department of Oral Biology, University of Pittsburgh, Pittsburgh, Pennsylvania, USA;
30. Experimental & Clinical Research Center, Department of Anesthesiology and Operative Intensive Care Medicine, Charité - University Medicine Berlin, Berlin, Germany;
31. Departments of Family and Community Medicine and Health and Clinical Outcomes Research, Saint Louis University, St. Louis, Missouri, USA
32. College Behavioral and Emotional Health Institute, Virginia Commonwealth University, Richmond, Virginia, USA;
33. Department of Human & Molecular Genetics, Virginia Commonwealth University, Richmond, Virginia, USA;
34. Department of Psychiatry, Yale University School of Medicine, New Haven, Connecticut, USA;
35. Department of Genetics, Yale University School of Medicine, New Haven, Connecticut, USA;
36. Department of Neuroscience, Yale University School of Medicine, New Haven, Connecticut, USA;
37. Department of Psychiatry, VA CT Healthcare Center, West Haven, Connecticut, USA;
38. Occupation and Environmental Epidemiology Branch, Division of Cancer Epidemiology and Genetics, National Cancer Institute, National Institutes of Health, United States Department of Health and Human Services, Bethesda, Maryland, USA
39. Center for Tobacco Research and Intervention, Department of Medicine, University of Wisconsin School of Medicine and Public Health, Madison, Wisconsin, USA;

40. Department of Public Health, Faculty of Medicine, University of Helsinki, Helsinki, Finland;
41. Fellow Program, Behavioral Health Research Division, RTI International, Research Triangle Park, North Carolina, USA;

## 1 **Abstract**

2 Cigarette smoking is the leading cause of preventable morbidity and mortality.  
3 Knowledge is evolving on genetics underlying initiation, regular smoking, nicotine dependence  
4 (ND), and cessation. We performed a genome-wide association study using the Fagerström Test  
5 for ND (FTND) in 58,000 smokers of European or African ancestry. Five genome-wide  
6 significant loci, including two novel loci *MAGI2/GNAII* (rs2714700) and *TENM2* (rs1862416)  
7 were identified, and loci reported for other smoking traits were extended to ND. Using the  
8 heaviness of smoking index (HSI) in the UK Biobank (N=33,791), rs2714700 was consistently  
9 associated, but rs1862416 was not associated, likely reflecting ND features not captured by the  
10 HSI. Both variants were *cis*-eQTLs (rs2714700 for *MAGI2-AS3* in hippocampus, rs1862416 for  
11 *TENM2* in lung), and expression of genes spanning ND-associated variants was enriched in  
12 cerebellum. SNP-based heritability of ND was 8.6%, and ND was genetically correlated with 17  
13 other smoking traits ( $r_g=0.40-0.95$ ) and co-morbidities. Our results emphasize the FTND as a  
14 composite phenotype that expands genetic knowledge of smoking, including loci specific to ND.

## 15 **Introduction**

16 Cigarette smoking remains the leading cause of preventable death worldwide,<sup>1</sup> despite the  
17 well-known adverse health effects. Smoking causes more than 7 million deaths annually from a  
18 multitude of diseases including cancer, chronic obstructive pulmonary disease (COPD), and  
19 heart disease.<sup>1,2</sup> Cigarette smoking is a multi-stage process consisting of initiation, regular  
20 smoking, nicotine dependence (ND), and cessation. Each step has a strong genetic component  
21 (for example, twin-based heritability estimates up to 70% for the transition from regular smoking  
22 to ND<sup>3,4</sup>), and partial overlaps are expected among the sets of sequence variants correlating with  
23 the different stages,<sup>3</sup> as evidenced by findings of the GWAS and Sequencing Consortium of

24 Alcohol and Nicotine use (GSCAN) with sample sizes up to 1.2 million individuals.<sup>5</sup> GSCAN  
25 identified 298 genome-wide significant loci associated with initiation (ever vs. never smoking),  
26 age at initiation, cigarettes per day (CPD), and/or cessation (current vs. former smoking); 259 of  
27 the loci harbored significant associations with initiation.<sup>5</sup>

28 In comparison to other stages of smoking, known loci for ND are limited. Only six  
29 reproducible, genome-wide significant loci have been identified: *CHRNA3-CHRNA6* (chr8p11),  
30 *DBH* (chr9q34), *CHRNA5-CHRNA3-CHRNA4* (chr15q25), *DNMT3B* and *NOL4L* (chr20q11),  
31 and *CHRNA4* (chr20q13).<sup>6</sup> A more complete understanding of the genetics underlying ND is  
32 needed, as it could help to predict the likelihood of quitting smoking, withdrawal severity,  
33 response to treatment, and health-related consequences.<sup>7-10</sup> The Fagerström Test for ND (FTND),  
34 also called the Fagerström Test for Cigarette Dependence,<sup>11</sup> provides a composite phenotype that  
35 captures multiple behavioral and psychological features of ND among smokers.<sup>12</sup> While CPD is  
36 associated with key markers of ND, such as cessation likelihood<sup>13</sup>, the FTND conveys additional  
37 valuable information by including 5 items in addition to CPD. FTND is meaningfully associated  
38 with tobacco use diagnostic criteria from the *Diagnostic and Statistical Manual of Mental*  
39 *Disorders*<sup>14,15</sup> and is more highly associated with withdrawal severity than is CPD.<sup>7</sup> Its validity  
40 may be due to the inclusion of the time-to-first-cigarette in the morning (TTFC) item, which  
41 appears to be especially strongly associated with relapse likelihood<sup>16-18</sup> and may be an especially  
42 informative measure of heritability of ND.<sup>19</sup> Thus, the FTND provides somewhat different  
43 information than CPD alone and has been relatively understudied from a genetic perspective  
44 because of its more limited availability across datasets.

45 The FTND score, based on totaling responses to the 6 items that constitute the FTND,  
46 ranges from 0 (no dependence) to 10 (highest dependence level).<sup>12,20</sup> In the present study, we

47 categorized FTND scores as mild (scores 0–3), moderate (scores 4–6), or severe (scores 7–10),  
48 as done before in studies comprising our Nicotine Dependence GenOmics (iNDiGO)  
49 Consortium.<sup>21,22</sup> We expand upon our prior analyses and report findings from the largest GWAS  
50 meta-analysis for ND (N=58,000; 46,213 European [EUR] and 11,787 African American [AA]  
51 ancestry participants from 23 studies) to identify novel genetic loci associated with ND, assess  
52 genetic correlations between ND and other phenotypes and gene expression patterns, and test  
53 GSCAN-identified loci<sup>5</sup> for effects on ND.

## 54 **Results**

### 55 *Cross-ancestry GWAS meta-analysis finds two novel SNP associations with ND*

56 Our cross-ancestry ND GWAS meta-analysis ( $\lambda=1.034$ , **Supplementary Figure 1A**)  
57 identified five genome-wide significant loci (**Figure 1**). Associations of the lead SNPs (single  
58 nucleotide polymorphisms) from each of these five loci are shown in **Table 1**. All genome-wide  
59 significant SNP/indel associations from the cross-ancestry meta-analysis are provided in  
60 **Supplementary Table 1**.

61 Three of the genome-wide significant loci have known associations with ND from our  
62 prior GWAS and others<sup>6</sup>: chr15q25<sup>21-23</sup> (smallest  $P=1.6\times 10^{-39}$  for rs16969968, a well-established  
63 functional missense [D398N] *CHRNA5* SNP<sup>24</sup>), chr20q13<sup>21</sup> (smallest  $P=1.2\times 10^{-12}$  for  
64 rs151176846, an intronic *CHRNA4* SNP), and chr9q34<sup>22</sup> (smallest  $P=1.1\times 10^{-8}$  for rs13284520,  
65 an intronic *DBH* SNP). In the EUR-specific GWAS meta-analysis, the loci spanning nicotinic  
66 acetylcholine receptor genes (*CHRNA5-A3-B4* and *CHRNA4*), but no novel loci, were identified  
67 at genome-wide significance ( $\lambda=1.036$ , **Supplementary Figures 1B** and **2A**). No genome-wide  
68 significant loci were found in the GWAS meta-analysis among AAs ( $\lambda=1.032$ , **Supplementary**  
69 **Figures 1C** and **2B**).

70 Two genome-wide significant loci from the cross-ancestry meta-analysis represent novel  
71 associations with ND. On chr7q21, the most significant SNP ( $P=2.3\times 10^{-9}$ ) was rs2714700, a SNP  
72 between the *MAGI2* and *GNAII* genes (**Supplementary Figures 3A–B**). The most significant  
73 SNP on chr5q34, rs1862416 ( $P=1.5\times 10^{-8}$ ), sits within an intron for *TENM2* (**Supplementary**  
74 **Figures 3C–D**). Both SNPs imputed well: sample size-weighted mean estimated  $r^2$  values were  
75 0.97 for rs2714700 and 0.92 for rs1862416. Further, both SNPs were common, and their  
76 associations with ND were observed across EURs and AAs (**Table 1**) and were largely  
77 consistent across studies (**Supplementary Figure 4A–B**): rs2714700-T being associated with  
78 reduced risk (meta-analysis odds ratio [OR] and 95% confidence interval [CI]=0.96 [0.94–0.97])  
79 and rs1862416-T being associated with increased risk (meta-analysis OR [95% CI]=1.08 [1.05–  
80 1.11]) for severe vs. mild ND. These comparisons of dissimilar categories were derived from the  
81 GWAS regression coefficients (i.e.,  $OR=\exp[2\times\beta]$  for severe vs. mild ND, with  $OR>1$   
82 corresponding to an increased risk of severe ND) to contextualize the magnitude of the observed  
83 effect sizes. Neither SNP showed evidence for heterogeneity, based on the  $I^2$  index<sup>25</sup>, across  
84 studies ( $P=0.83$  for rs2714700 and  $0.75$  for rs1862416). Leave-one-study-out analyses  
85 (**Supplementary Table 2**) revealed some variability in p-values ( $P=3.1\times 10^{-7}$ – $7.4\times 10^{-9}$  for  
86 rs2714700 and  $P=5.6\times 10^{-9}$ – $3.9\times 10^{-6}$  for rs1862416), likely due to fluctuating statistical power  
87 given the significant correlation between N and p-value across iterations:  $r=-0.65$ ,  $P=8.6\times 10^{-5}$ .  
88 However, there was little variation in the effect sizes (range of  $\beta$  values corresponding to the OR  
89 for severe vs. mild ND = 0.95–0.96 for rs2714700-T and 1.07–1.08 for rs1862416-T).

90 We compared the novel ND-associated SNPs with results reported for other smoking  
91 traits by GSCAN.<sup>5</sup> European ancestry participants from 8 iNDiGO studies were included in  
92 GSCAN (**Supplementary Table 3**). Both the *MAGI2/GNAII* SNP rs2714700 and the *TENM2*

93 SNP rs1862416 were nominally associated at  $P < 0.05$  with ever vs. never smoking and rs2714700  
94 with CPD in consistent directions with ND; neither SNP was associated with age at initiation or  
95 smoking cessation (**Supplementary Table 4**).

96 For replication in an independent sample, we analyzed the two novel SNPs (rs2714700  
97 and rs1862416) for association with the heaviness of smoking index (HSI) in the UK Biobank.  
98 Results are shown in **Supplementary Table 6**. HSI is based on two items (CPD and TTFC) of  
99 the 6 items that constitute the FTND; the HSI and full-scale FTND are highly correlated (e.g.,  
100  $r = 0.7$  among nondaily smokers and  $0.9$  among daily smokers).<sup>26</sup> The *MAGI2/GNAII* SNP,  
101 rs2714700, was associated with HSI at  $P = 0.014$ , which surpassed Bonferroni correction for two  
102 SNP tests, and meta-analysis of iNDiGO studies with UK Biobank (total  $N = 91,791$ ) supported  
103 rs2714700-T being associated with milder ND ( $P = 7.7 \times 10^{-9}$ ). The *TENM2* SNP, rs1862416, was  
104 not associated with HSI in the UK Biobank ( $P = 0.39$ ).

105 To determine whether the novel genome-wide associations were driven by specific  
106 FTND items or shared across items, we returned to the iNDiGO studies, tested SNP associations  
107 with each specific FTND item, and combined results via cross-ancestry meta-analyses. For  
108 rs2714700, we observed the lowest p-values for the two items that constitute the HSI (**Figure**  
109 **2A**): TTFC ( $P = 5.3 \times 10^{-4}$ ) and CPD ( $P = 1.1 \times 10^{-3}$ ). Rs2714700 was also associated at  $P < 0.05$  with  
110 difficult in refraining from smoking in forbidden places ( $P = 0.025$ ) and the cigarette most hated  
111 to give up ( $P = 0.030$ ). Rs1862416 was associated with TTFC ( $P = 0.018$ ) and two items that are  
112 not captured by the HSI: the cigarette most hated to give up ( $P = 0.015$ ) and smoking when ill  
113 ( $P = 0.023$ ) (**Figure 2B**).

114 ***GWAS findings for other smoking traits extend to ND***



115 We assessed whether genome-wide significant SNPs identified for smoking traits in  
116 GSCAN extended to ND using results from the cross-ancestry GWAS meta-analysis. We  
117 focused on the 55 genome-wide significant SNPs from 40 loci associated with CPD, given that it  
118 displayed the best genetic correlation with ND (**Figure 3**). After applying Bonferroni correction  
119 for the 53 SNPs that were available in our meta-analysis ( $P < 9.4 \times 10^{-4}$ ), 17 SNPs had a  
120 statistically significant and directionally consistent association with ND (**Table 2**). These SNPs  
121 span six loci reported at genome-wide or nominal significance in prior GWAS of ND (*CHRNA5-*  
122 *A3-B4* [chr15], *CHRNA4* [chr20], *DBH* [chr9], *CHRNA3* [chr8], *CYP2A6* [chr19], and *NOLAL*  
123 [near *DNMT3B*, chr20])<sup>6</sup> and three loci not reported in prior ND GWAS—*DRD2* (chr11),  
124 *C16orf97* (chr16), and *CHRNA2* (chr1).

### 125 ***Gene-based association analyses highlight known genetic loci***

126 Using Hi-C coupled multi-marker analysis of genomic annotation (H-MAGMA)<sup>27</sup> on the  
127 EUR-specific GWAS meta-analysis results from iNDiGO, 11 genes when using fetal brain tissue  
128 and 13 genes when using adult brain tissue were associated with ND at  $P < 2.7 \times 10^{-6}$ , based on  
129 correction for testing 18,655 protein coding genes. See **Supplementary Tables 7 and 8** for the  
130 genome-wide H-MAGMA results for fetal and adult tissues, respectively. Of the 16 unique genes  
131 identified, 10 genes in three known loci were associated with HSI in the UK Biobank at  
132  $P < 0.0031$ , based on correction for testing 16 genes (**Supplementary Table 9**): the *ACSBG1-*  
133 *WDR61-IREB2-HYKK-PSMA4-CHRNA5-CHRNA3-CHRNA4-ADAMTS7-MORF4L1* gene  
134 cluster on chr. 15q25, *CHRNA4* on chr. 20q13, and the *ADAMTS2* and *DBH* genes in close  
135 proximity on chr. 9q34. Two novel genes on distinct chromosomes were identified in iNDiGO  
136 (*AFGIL* on chr. 6q21 and *AK2* on chr. 1p35), but their associations were not corroborated in UK  
137 Biobank.

138 We also applied Summary-MultiXcan (S-MultiXcan)<sup>28</sup> to the EUR-specific GWAS meta-  
139 analysis results and found significant associations for two chromosome 15q25 genes (*PSMA4*  
140 and *CHRNA5*), when considering *cis*-eQTL evidence from either the multi-tissue or single best  
141 tissue (substantia nigra). See **Supplementary Table 10** for the genome-wide S-MultiXcan  
142 results. Both genes were also associated with HSI in UK Biobank from multi-tissue ( $P=2.4\times 10^{-8}$   
143 for *PSMA4* and  $1.3\times 10^{-6}$  for *CHRNA5*) or single best tissue ( $P=9.6\times 10^{-14}$  for *PSMA4* and  $4.6\times 10^{-$   
144 <sup>8</sup> for *CHRNA5*, both in substantia nigra).

#### 145 *ND is genetically correlated with 17 other phenotypes*

146 We estimated the heritability explained by common SNPs of ND at  $h_g^2$  (standard error) =  
147 0.086 (0.012), using LDSC<sup>29</sup> and the EUR-specific GWAS meta-analysis results. We also found  
148 statistically significant genetic correlations of ND with 17 phenotypes (Bonferroni-corrected  
149  $P<0.0011$ ; **Figure 3** and **Supplementary Table 11**). Positive correlations indicate that the  
150 genetic predisposition to higher ND risk was correlated with genetic risks for other smoking  
151 traits<sup>5</sup> (smallest  $P=3.1\times 10^{-70}$  for higher CPD [ $r_g=0.95$ ], followed by  $P=3.2\times 10^{-16}$  for current  
152 smoking [ $r_g=0.54$ ] and  $P=3.2\times 10^{-16}$  for ever smoking [ $r_g=0.40$ ]). We repeated LDSC, after  
153 removing all chr15q25 variants between 78.5 and 79.5 MB and found only negligible differences  
154 in these correlations ( $r_g=0.94$  for higher CPD,  $r_g=0.51$  for current smoking, and  $r_g=0.42$  for ever  
155 smoking). Beyond the smoking traits, with all SNPs included, higher ND was genetically  
156 correlated with higher risks of alcohol dependence,<sup>30</sup> neuroticism,<sup>31</sup> psychiatric diseases  
157 (attention deficit hyperactivity disorder,<sup>32</sup> bipolar disorder,<sup>33</sup> major depressive disorder<sup>34</sup> and its  
158 symptoms,<sup>31</sup> posttraumatic stress disorder, and schizophrenia<sup>35</sup>), and smoking-related  
159 consequences (lung cancer and its histological subtypes<sup>36</sup> and coronary artery disease<sup>37</sup>). Among  
160 these positively correlated traits,  $r_g$  values ranged from 0.16 (schizophrenia) to 0.77 (squamous

161 cell lung cancer). Higher risk of ND was genetically correlated with lower age of smoking  
162 initiation<sup>5</sup> ( $r_g=-0.55$ ) and fewer years of schooling<sup>38</sup> ( $r_g=-0.34$ ).

163 For the traits with statistically significant genetic correlations with ND from the cigarette  
164 smoking, drug and alcohol use, personality, and psychiatric categories, we applied pairwise  
165 GWAS (GWAS-PW)<sup>39</sup> to identify shared genetic influences between FTND and each of these  
166 traits (**Supplementary Figure 5**). GWAS-PW provides posterior probabilities for several models  
167 of genetic influence, including whether a given genomic region contains a variant that influences  
168 only ND (model 1), only the other trait (model 2), or both ND and the other trait (model 3). It  
169 also considers the scenario of whether the region contains a variant that influences ND and a  
170 separate variant influences the other trait (model 4). Both novel FTND-associated GWAS loci  
171 showed large probabilities for model 4 when comparing alcohol dependence and ND (posterior  
172 probabilities  $> 0.97$ ). The region surrounding rs2714700 also showed large model 4 probabilities  
173 for comparisons with depressive symptoms and schizophrenia. The region surrounding  
174 rs1862416 exhibited large model 3 probabilities for major depressive disorder and smoking  
175 initiation.

176 Rs1862416 was located within the boundaries of a genome-wide significant locus for  
177 smoking initiation (chr5:164,596,435-168,114,971), and to assess the independence of  
178 association signals at the single variant level, we performed conditional modeling using  
179 Genome-wide Complex Trait Analysis (GCTA).<sup>40,41</sup> All 6 lead SNPs in this GSCAN-identified  
180 locus were in low LD with rs1862416 (maximum  $r^2=0.0047$  [**Supplementary Figure 6**],  
181 maximum  $D'=0.46$ ), and three were nominally associated with ND at  $P<0.05$  (**Supplementary**  
182 **Table 5**). Among our iNDiGO studies, rs1862416 remained associated with ND in models  
183 conditioned on each GSCAN lead SNP individually ( $P=7.9\times 10^{-8}$ – $1.8\times 10^{-8}$ ) and with all 6 SNPs

184 taken together ( $P=2.2\times 10^{-7}$ ). Rs2714700 was located >1 MB away from any GSCAN-identified  
185 locus, so conditional modeling was not necessary. Altogether, the GWAS-PW results suggest  
186 pleiotropy of smoking-related and comorbid traits in our two novel ND-associated regions, but at  
187 the variant level, the rs2714700 and rs1862416 associations with ND are independent of the  
188 GSCAN-identified variants.

189 ***Gene expression data implicates target genes for novel ND-associated SNPs and identifies ND***  
190 ***heritability enrichment in cerebellum***

191 Credible set analysis of the chr7q21 locus narrowed the list of most likely causal variants  
192 to the lead SNP (rs2714700) and three others (rs2714674, rs1464692, and rs2707864)  
193 (**Supplementary Table 12**). Rs2714700, an intergenic SNP, is not a significant *cis*-eQTL with  
194 any gene-level expression in the Genotype-Tissue Expression (GTEx; v8) project, but it was  
195 implicated as a *cis*-eQTL for the *MAGI2-AS3* transcript in hippocampus from BrainSeq<sup>42</sup>  
196 ( $N=551$ ;  $P=8.5\times 10^{-4}$ ). The protective allele for ND (rs2714700-T) was associated with higher  
197 expression of the *MAGI2-AS3* transcript ENST00000414797.5. Rs1464692 was also implicated  
198 as a *cis*-eQTL for the *MAGI2-AS3* transcript in hippocampus from BrainSeq ( $N=551$ ;  $P=8.1\times 10^{-$   
199  $4$ ), and rs2707864 is located in a DNaseI hypersensitivity site in adult and fetal fibroblast cells in  
200 HaploReg<sup>39</sup> (**Supplementary Table 12**).

201 The lead SNP at the chr5q34 locus, rs1862416, is annotated to enhancer histone marks in  
202 brain (specifically, germinal matrix during fetal development and the developed prefrontal  
203 cortex, anterior caudate, and cingulate gyrus tissues) and several other tissues in HaploReg.<sup>43</sup> It  
204 is also located in the promoter of *CTB-77H17.1*, which is a novel antisense RNA transcript  
205 encoded within a *TENM2* intron. In GTEx, rs1862416 was reported as a significant lung-specific  
206 *cis*-eQTL SNP *TENM2*. The ND risk-conferring allele (rs1862416-T) was associated with

207 decreased gene-level *TENM2* expression in lung. *CTB-77H17.1* was too lowly expressed across  
208 GTEx tissues to test its expression levels by rs1862416. Two additional, potentially causal  
209 variants identified in a credible set analysis were similarly annotated to enhancer and promoter  
210 markers in brain (prefrontal cortex, astrocyte) and fetal lung in HaploReg (rs36064369) and as  
211 lung-specific *cis*-eQTL in GTEx (rs116612101) (**Supplementary Table 12**).

212 To assess whether heritability of ND is enriched in regions surrounding genes with the  
213 highest specific gene expression patterns in given tissue/cell type(s), we applied LDSC-SEG<sup>44</sup>  
214 using the EUR-specific ND GWAS meta-analysis results with reference to 205 tissues/cell types  
215 with publicly available gene expression data assembled from GTEx<sup>45</sup> (53 human tissues/cell  
216 types) and the underlying data that is used to comprise the Data-driven Expression Prioritized  
217 Integration for Complex Traits (DEPICT) tool<sup>46,47</sup> (152 tissues/cell types from humans and  
218 rodent models). We observed statistically significant enrichment in one tissue (cerebellum) at  
219 Bonferroni-corrected  $P < 2.4 \times 10^{-4}$  (**Supplementary Table 13**), indicating that genes spanning  
220 ND-associated SNPs are enriched for specific expression in the cerebellum relative to other  
221 tissues/cell types.

## 222 **Discussion**

223 We expanded current knowledge of ND in this largest GWAS to date, by identifying two  
224 novel genome-wide significant loci as well as 3 known loci, extending associations of additional  
225 loci implicated for other smoking phenotypes, and detecting significant genetic correlations of  
226 ND with 13 other complex phenotypes and with gene expression in cerebellum. The top novel  
227 SNPs between *MAGI2* and *GNAII* (chr7q21) and in *TENM2* (chr5q34) were independent of  
228 previously reported GWAS signals for any smoking trait. Three of our genome-wide significant  
229 loci were known: (1) *CHRNA5-CHRNA3-CHRNA4* (chr15q25) is irrefutably associated with

230 ND, as driven largely by CPD.<sup>6</sup> (2) Our initial GWAS meta-analysis of 5 studies (now part of the  
231 iNDiGO consortium)<sup>21</sup> identified *CHRNA4* (chr20q13) at genome-wide significance. Subsequent  
232 associations were found with heavy vs. never smoking in the UK Biobank<sup>48</sup> and with initiation,  
233 CPD, and cessation in GSCAN.<sup>5</sup> (3) *DBH* (chr9q34) was first identified as genome-wide  
234 significant for smoking cessation but later associated with ND in our meta-analysis of 15 studies  
235 (now part of the iNDiGO consortium)<sup>22</sup> and with CPD and cessation in GSCAN.<sup>5</sup> Known loci  
236 were corroborated at the gene level with aggregated single SNP associations that take physical  
237 proximity and chromatin interactions or *cis*-eQTL evidence into account.

238         The novel ND-associated locus with lead SNP rs2714700 is intergenic between *MAGI2*  
239 (membrane associated guanylate kinase, WW and PDZ domain containing 2) and *GNAI1* (G  
240 protein subunit alpha i1). We identified rs2714700 at genome-wide significance for its  
241 association with ND, which was driven by CPD (unlike rs1862416), TTFC, and other FTND  
242 items, indicating that this SNP association may reflect both primary and secondary features of  
243 ND. Primary (or core) features of ND are necessary and sufficient for habit formation (heaviness  
244 of smoking [tolerance], automaticity, loss of control, and craving), while secondary features of  
245 ND underlie smoking that is goal based, e.g., relief of negative mood or cognitive  
246 enhancement.<sup>49-52</sup> Rs2714700 was also associated with HSI in the independent UK Biobank. The  
247 *cis*-eQTL evidence for rs2714700 in the hippocampus suggests that it may influence expression  
248 of the long noncoding RNA *MAGI2-AS3* (*MAGI2* antisense RNA 3). *MAGI2-AS3* has been  
249 mainly studied for its role in the progression of cancer, including glioma in the brain.<sup>53</sup> No  
250 genome-wide significant associations have been reported within 1MB of rs2714700 in the  
251 GWAS catalog. Our evidence of genome-wide significance for rs2714700 points to a novel locus

252 that has not been associated with smoking or any related trait, and its functional relevance merits  
253 further investigation.

254 We also observed a genome-wide significant association of ND with rs1862416, a lung-  
255 specific *cis*-eQTL for *TENM2*. *TENM2* encodes teneurin transmembrane protein 2, a cell surface  
256 receptor that plays a fundamental role in neuronal connectivity and synaptogenesis.<sup>54</sup> With  
257 rs1862416 residing in the promoter of *CTB-77H17.1*, it could influence this antisense RNA,  
258 which in turn could dysregulate its sense transcript, *TENM2*. As an illustrative example, the SNP  
259 rs4307059, identified at genome-wide significance and independently replicated for autism,<sup>55</sup> is  
260 annotated to and acts as a promoter region *cis*-eQTL for the antisense RNA *MSNPIAS* (moesin  
261 pseudogene 1, antisense) that influences regulation of its sense transcript, *MSN*.<sup>56</sup> However,  
262 while rs1862416 is generally indicated for its potential regulatory role (i.e., enhancer and  
263 promoter annotations and *cis*-eQTL evidence), its specific effect on either *CTB-77H17.1* or  
264 *TENM2* regulation in brain tissue was not evident in currently available data.

265 Further, independent association testing using HSI in the UK Biobank did not yield  
266 statistical significance for rs1862416. Similarly, the gene-based associations for the novel loci  
267 were not corroborated in UK Biobank. These differences in observed SNP- and gene-based  
268 associations may reflect components of ND that are not fully captured by the two FTND items  
269 that comprise the HSI (TTFC and CPD), as suggested by the specific FTND item association  
270 testing among the iNDiGO studies. Rs1862416 was suggestively associated ( $P < 0.05$ ) with  
271 TTFC, “Which cigarette would you hate most to give up?” (the first one in the morning vs. all  
272 others), and “Do/did you smoke if you are so ill that you are in bed most of the day?” (yes/no).  
273 These item responses reflect withdrawal symptoms that are indicative of secondary features of  
274 ND, as compared with primary features of ND associated with habit formation.<sup>49-52</sup> Having the

275 composite ND phenotype may have enhanced our power for discovering *TENM2*, but its  
276 detection in the UK Biobank may have been limited by the reliance on the HSI.

277 Beyond our discovery of rs1862416 with ND, SNPs across the *TENM2* gene have been  
278 identified at genome-wide significance, as presented in the GWAS catalog<sup>57</sup>, for educational  
279 attainment,<sup>38</sup> smoking initiation (ever vs. never smoking),<sup>5,58-60</sup> age of smoking initiation,<sup>5</sup>  
280 smoking cessation (current vs. former smoking),<sup>5</sup> cigarette pack-years,<sup>61</sup> alcohol consumption  
281 (drinks per week),<sup>5</sup> lung function,<sup>60,62</sup> height,<sup>60</sup> number of sexual partners,<sup>58</sup> depression,<sup>63,64</sup> risk  
282 taking tendency,<sup>58</sup> body mass index,<sup>60</sup> menarche (age at onset)<sup>65</sup>, and regular attendance at a  
283 religious group<sup>66</sup>. Our pairwise comparisons supported pleiotropic associations in the *TENM2*  
284 region. At the variant level, all *TENM2* SNPs in the GWAS catalog have very low  $r^2$  values with  
285 our novel SNP, rs1862416 (**Supplementary Figure 6**), and our conditional modeling results  
286 showed that rs1862416 was associated with ND independently from other *TENM2* SNPs  
287 implicated in GSCAN. While rs1862416 may have an ND-specific effect, the *TENM2* region has  
288 pleiotropic effects on ND, traits that are genetically correlated with ND, and other traits.

289 The genetics of smoking behaviors, more broadly, has rapidly evolved with the GSCAN  
290 consortium having amassed a very large sample size and identified 298 genome-wide significant  
291 loci for smoking traits representing single components: ever vs. never smoking, age of smoking  
292 initiation, CPD, and current vs. former smoking.<sup>5</sup> We observed statistically significant genetic  
293 correlations of each of these smoking traits with ND (highest  $r_g=0.95$ , as observed between ND  
294 and CPD), yet our two novel ND-associated loci were not identified at genome-wide significance  
295 by GSCAN (smallest  $P=0.033$  for rs1862416-T; smallest  $P=0.016$  for rs2714700-T), suggesting  
296 that these loci are specific to ND. Similarly, the majority of GSCAN-identified loci were trait-  
297 specific (191 of the 298 loci), where the other 107 loci were pleiotropic with associations



298 identified for two or more of the smoking traits.<sup>5</sup> In our evaluation of GSCAN-identified loci, we  
299 corroborated associations of several previously implicated loci for ND (e.g., nicotine  
300 acetylcholine receptors genes *CHRNA5-A3-B4* and *CHRNA4*) and three additional loci (*DRD2*,  
301 *C16orf97*, and *CHRNA2*) that have not been reported in prior ND GWAS. Of these loci, *DRD2* is  
302 notable as a long-studied addiction candidate gene<sup>4</sup> and its recent identification as genome-wide  
303 significant for alcohol use disorder for rs4936277<sup>67</sup>, which is correlated ( $r^2=0.94$  in 1000G EUR,  
304 0.82 in 1000G AFR) with rs7125588, the top SNP identified for CPD in GSCAN and associated  
305 with ND in iNDiGO; these results support a shared genetic effect of *DRD2* underlying addiction.  
306 Notably, rs7125588 is not correlated ( $r^2=0.04$  in 1000G EUR, 0.01 in 1000G AFR) with the  
307 *DRD2* variant rs1800497 (historically referred to as the ‘Taq1A’ polymorphism), which is not  
308 significantly associated with ND in iNDiGO ( $P=0.24$ ).

309 Other GSCAN loci were detected for the single component smoking traits but show no  
310 evidence for association in our study (**Supplementary Table 14**), suggesting that these loci  
311 influence stages of smoking other than ND, or they exert weak effects on ND that we were  
312 underpowered to detect. We expect that additional GSCAN-identified loci are associated with  
313 ND, but their detection will require a larger sample size. These results demonstrate the utility of  
314 studying the genetics of the composite ND phenotype and comparing with GWAS of other  
315 smoking traits to tease apart loci that are specific to one stage (i.e., initiation, regular smoking,  
316 ND, cessation) vs. loci that influence multiple stages to better understand the full spectrum of  
317 smoking behaviors.

318 Beyond the smoking traits, we observed significant genetic correlations between ND and  
319 alcohol dependence<sup>30</sup>, years of schooling<sup>38</sup>, neuroticism<sup>31</sup>, comorbid psychiatric traits (attention  
320 deficit hyperactivity disorder<sup>32</sup>, bipolar disorder<sup>33</sup>, major depression<sup>34</sup>, schizophrenia<sup>35</sup>, and

321 posttraumatic stress disorder<sup>68</sup>), and smoking-related health consequences (lung cancer<sup>36</sup> and  
322 coronary artery disease<sup>37</sup>). Some of these observations corroborate prior findings (for example,  
323 alcohol dependence<sup>30</sup> and schizophrenia<sup>69,70</sup> with ND), whereas the other correlations extend to  
324 ND prior observations for the single component smoking traits (for example, CPD with years of  
325 schooling<sup>5</sup>, neuroticism<sup>5</sup>, major depression<sup>5</sup>, coronary artery disease<sup>5</sup>, and lung cancer<sup>36</sup>). The  
326 genetic correlation between ND and gene expression in cerebellum is a notable observation  
327 consistent with cerebellum-specific *cis*-eQTL effects observed for the ND-associated *DNMT3B*  
328 SNP rs910083<sup>22</sup> and the age of smoking initiation-associated *CHRNA2* SNP rs11780471<sup>36</sup>, both  
329 of which are also associated with lung cancer. These findings add to the evidence that the  
330 cerebellum may be important for ND risk,<sup>71,72</sup> in addition to the other addiction-relevant brain  
331 tissues. However, since the cerebellum contains a higher neuronal concentration than other brain  
332 tissues,<sup>44,73</sup> future studies are needed to decipher whether the cerebellar gene regulatory effects in  
333 the etiology of ND are due to neuronal activity. Additionally, although genetic correlation  
334 between ND and another trait suggest shared genetics underlying the phenotypes, multiple  
335 mechanisms can produce significant correlations (i.e., unmeasured intermediary phenotypes,  
336 correlated risk variants, mediation).<sup>74-76</sup> Identifying the true mechanistic explanation requires  
337 further investigations.

338         The present ND GWAS meta-analysis follows two prior waves of data assembly by the  
339 iNDiGO consortium (Ns=17,074<sup>21</sup>, 38,602<sup>22</sup>, and now 58,000) and is the largest to date for the  
340 field. Despite still having substantially smaller sample sizes than the GSCAN GWAS, at each  
341 wave, increasing sample size for diverse ancestry groups (EURs and AAs) has illuminated ND-  
342 associated loci, some of which are shared with other stages of smoking while others are specific  
343 to ND. Our present findings underscore the complexity even within the ND phenotype, as our

344 novel loci displayed patterns of association with specific FTND items that reflect primary or  
345 secondary ND features, e.g., the *TENM2* SNP influenced secondary features that are not captured  
346 simply by heaviness of smoking. Future studies are needed to further dissect the genetic  
347 architectures underlying each of the specific FTND items. Understanding genetic similarities and  
348 differences that underlie these items and their contributions to primary vs. secondary ND may  
349 better inform treatment strategies, e.g., changing environmental cues for individuals whose  
350 smoking is driven solely by primary ND features vs. treating withdrawal for individuals whose  
351 ND is augmented with secondary features.<sup>51</sup> Studying the genetics of ND alongside other  
352 smoking traits (e.g., initiation and cessation) is key to gaining a better understanding of the  
353 neurobiological perturbations that influence the trajectory of smoking behaviors and their  
354 treatment implications.

## 355 **Methods**

356 We assembled 58,000 participants from 23 iNDiGO consortium studies with genome-  
357 wide SNP genotypes and FTND phenotype data available for ever smokers to perform ND  
358 GWAS meta-analyses. Fifteen of the studies were included from our prior GWAS using their  
359 original or updated sample sizes (total N increased from 38,602<sup>22</sup> to 46,098 in the current  
360 analysis), while 8 studies were added for the current study (total N=11,902). Participant  
361 characteristics are provided in **Supplementary Table 3**, and details of the study designs,  
362 genotyping, quality control, imputation, and statistical analyses are provided in the  
363 **Supplementary Methods**. Institutional review boards at the respective sites approved the study  
364 protocols, and all participants provided written informed consent.

## 365 *ND GWAS meta-analysis*

366 The FTND is a well-validated, widely used 6-item questionnaire that assesses  
367 psychologic dependence on nicotine, with scores ranging from 0 (no dependence) to 10 (highest  
368 dependence level).<sup>12,20</sup> As done before,<sup>21,22</sup> we categorized FTND scores as mild (scores 0–3),  
369 moderate (scores 4–6), or severe (scores 7–10). FTND data reflected current smoking behaviors  
370 at the time of interview (i.e., current FTND) or the period of heaviest smoking among ever  
371 smokers (i.e., lifetime FTND). We previously found only small differences in genetic association  
372 results due to any measurement variance when using current vs. lifetime FTND.<sup>77</sup> See  
373 **Supplementary Methods** for further details on the ND phenotype data by study.

374 For each study, genome-wide SNP/indel associations with the 3-level categorical ND  
375 outcome were tested within an ancestry group using linear regression. Covariates included age,  
376 sex, principal component eigenvectors, and study-specific covariates where warranted. For  
377 studies that included relatives, relatedness was accounted for in the regression modeling. See the  
378 **Supplementary Methods** for additional study-specific details.

379 GWAS results were combined using fixed-effect inverse variance-weighted meta-  
380 analyses in METAL.<sup>78</sup> Prior to performing meta-analyses, we applied genomic control to results  
381 from one study, deCODE, to adjust for inflation due to relatedness among participants ( $\lambda=1.12$ );  
382 all other studies had low inflation ( $\lambda=0.99-1.04$ ) (**Supplementary Table 3**). We removed  
383 SNPs/indels with minor allele frequency (MAF) <1% in the 1000G phase 3 reference panel for  
384 the analyzed ancestry group (1000G European or African superpopulations), imputation info  
385 score <0.3, or availability in only one study. All variant annotations correspond to the National  
386 Center for Biotechnology Information (NCBI) build 37. As before<sup>22</sup>, the threshold of genome-  
387 wide significance was set at  $P = 5 \times 10^{-8}$ . Regional association plots of novel genome-wide  
388 significant loci were constructed using LocusZoom<sup>79</sup> with references of either 1000G European

389 or African panels to estimate linkage disequilibrium of the lead SNP (based on smallest meta-  
390 analysis P-value) and surrounding SNPs. The lead SNP for each novel FTND locus was tested  
391 for association with each of the specific FTND items (**Supplementary Methods**).

392 For any ND-associated SNPs located within the bounds of loci identified by GSCAN (1  
393 MB surrounding the lead SNP),<sup>5</sup> conditional models were analyzed using our GWAS summary  
394 statistics and the Genome-wide Complex Trait Analysis (GCTA) tool, adjusted for the lead SNPs  
395 in GSCAN.<sup>40,41</sup> To contextualize the magnitude of the observed effect sizes, we calculated odds  
396 ratios (ORs) using the  $\beta$  estimate from the single SNP linear regression model ( $OR = \exp[2 \times \beta_{SNP}]$   
397 for severe vs. mild ND, with  $OR > 1$  corresponding to an increased risk of severe ND) and  
398 compared these values across studies and ancestries using the Forest Plot Viewer.<sup>80</sup>

### 399 ***Independent testing using heaviness of smoking index in the UK Biobank***

400 Novel, genome-wide significant SNPs from our ND GWAS meta-analysis were tested in  
401 the UK Biobank. Although all 6 items of the FTND were not collected in the UK Biobank, two  
402 items (CPD and TTFC) were collected among current smokers. These two items together form  
403 the HSI, which is highly correlated with the full-scale FTND.<sup>26</sup> We derived HSI scores, ranging  
404 from 0 (no dependence) to 6 (highest dependence level), and categorized them as follows: mild  
405 (scores 0–2), moderate (scores 3–4), and severe (scores 5–6). These HSI categories were highly  
406 concordant (89.3%) with our routinely used FTND categories using the COGEN study, which  
407 was ascertained specifically for ND (**Supplementary Methods** and **Supplementary Table 15**).  
408 The final analysis dataset included 33,791 current smokers (18,063 mildly, 13,395 moderately,  
409 and 2,333 severely dependent, as defined by HSI). Our linear regression model included  
410 covariates for age, sex, and principal component eigenvectors (**Supplementary Methods**).

411

## 412 *Gene-based association testing*

413 To assess evidence for association beyond single variants, we applied two methods that  
414 aggregate SNP-based summary statistics at the gene level. For genome-wide testing with both  
415 methods, we used the EUR-specific GWAS meta-analysis results from iNDiGO as the input  
416 dataset, given the reliance on linkage disequilibrium (LD) reference data by ancestry in  
417 calculating the gene-based summary statistics. First, H-MAGMA<sup>27</sup> computes gene-based  
418 association statistics by aggregating SNP associations based on physical proximity to the target  
419 gene(s) measured by chromatin interaction maps from human brain tissue. We included SNPs  
420 with an rs identification number (9,525,836 SNPs) and coupled them with Hi-C reference  
421 datasets from fetal<sup>81</sup> and adult brain tissues, specifically cortical tissues,<sup>82</sup> that are available for  
422 running H-MAGMA. H-MAGMA converted SNP-level p-values into gene-level p-values. We  
423 identified statistically significant genes that were associated with ND at Bonferroni-corrected  
424 threshold of  $P < 2.7 \times 10^{-6}$  ( $\alpha = 0.05/18,655$  protein coding genes).

425 Second, we applied Summary-MultiXcan (S-MultiXcan)<sup>28</sup> to compute gene-level  
426 associations by leveraging imputed genetically driven gene expression using RNA-Seq across  
427 the 13 adult brain tissues in GTEx as reference data. S-MultiXcan<sup>28</sup>, an extension of the S-  
428 PrediXcan method for integrating eQTLs with GWAS summary statistics<sup>83</sup>, aggregates eQTL  
429 information across multiple tissue types to enhance statistical power, while still presenting the  
430 single tissue with the best evidence for association. We applied Bonferroni correction to declare  
431 statistically significant gene-based associations as  $P < 3.5 \times 10^{-6}$  ( $\alpha = 0.05/14,494$  genes).

432 For both gene-based methods, we carried forward significant gene-level associations and  
433 tested them in the UK Biobank, using HSI as a proxy for ND, as done with the single SNP  
434 associations.

435 ***Genetic correlations of ND with other complex phenotypes and with gene expression***

436 Summary statistics from the EUR-specific meta-analyses were used as input into LD  
437 score regression (LDSC)<sup>29</sup> with reference to the 1000G EUR panel to estimate the SNP  
438 heritability ( $h_g^2$ ) of ND and its genetic correlations with 46 other complex phenotypes, including  
439 other smoking, drug, and alcohol use and dependence traits, smoking-related health  
440 consequences (e.g., cancer, COPD, and coronary heart disease), psychiatric and neurologic  
441 disorders, cognitive and educational traits, and brain volume metrics. The full list of phenotypes  
442 and GWAS datasets, as obtained from LD Hub<sup>84</sup> or shared by the original study investigators,  
443 are provided in **Supplementary Table 11**.

444 Similarly, EUR-specific GWAS meta-analysis summary statistics were input into  
445 stratified LDSC, as applied to specifically expressed genes (LDSC-SEG),<sup>44</sup> with reference to 205  
446 tissues and cell types from two sources—RNA-sequencing data on 53 human tissues/cell types in  
447 GTEx<sup>85</sup> and array-based data on 152 tissues/cell types from humans and rodent models that  
448 underlie the DEPICT tool and made available in Gene Expression Omnibus.<sup>46,47</sup> See full list of  
449 the 205 tissues/cell types in **Supplementary Table 13**. Similarly to the initial application of  
450 LDSC-SEG,<sup>44</sup> these two sources were selected because their expression data included a wide  
451 range of ND-relevant and other tissues and cell types in humans, as opposed to focused  
452 information on a particular tissue. LDSC-SEG involved comparing expression of each gene in  
453 each tissue/cell type with that in other tissues/cell types, selecting the top 10% of differentially  
454 expressed genes, annotating SNPs from the GWAS summary statistics that lie within 100kb  
455 windows of the selected genes, and using the stratified LDSC method to estimate the enrichment  
456 in SNP heritability for ND for the given gene set compared to the baseline LDSC model with all  
457 genes. For each analysis, a Bonferroni correction was applied to assess statistical significance:

458  $P < 0.0011$  ( $\alpha = 0.05/46$  phenotypes) for LDSC and  $P < 2.4 \times 10^{-4}$  ( $\alpha = 0.05/205$  tissues/cell types) for  
459 LDSC-SEG.

#### 460 *Associations of ND loci with other complex traits*

461 We applied pairwise GWAS (GWAS-PW v0.21 [[github.com/joepickrell/gwas-pw/](https://github.com/joepickrell/gwas-pw/)])<sup>39</sup> to  
462 characterize the cross-phenotype associations for ND and its genetically correlated phenotypes,  
463 as revealed in the LDSC analyses. Specifically, we applied GWAS-PW to the "Cigarette  
464 smoking", "Drug and alcohol use", "Personality", and "Psychiatric" phenotypes with significant  
465 genetic correlation with ND. Using EUR-specific GWAS summary statistics for ND and its  
466 correlated phenotypes, for each pairwise comparison of ND to a given phenotype, we calculated  
467 a correlation statistic that is used by GWAS-PW to account for potential sample overlaps  
468 between studies. We followed the approach as detailed in Pickrell et al.<sup>39</sup> We then reduced the  
469 SNP set to only SNPs with summary statistics available from both studies and that also were  
470 located within an LD block for any of the 5 FTND GWAS significant loci. We defined the LD  
471 blocks by using LDproxy<sup>86</sup> with the top (i.e., most significant) SNP from each FTND-associated  
472 locus and extracting  $r^2$  values (based on 1000 Genomes Phase 3 EUR populations) for all SNPs  
473 within 0.5 Mb of the top SNP. The minimum and maximum genomic coordinate for all extracted  
474 SNPs with  $r^2 > 0.2$  were used as the LD block boundaries.

#### 475 *cis-eQTL assessment of novel ND-associated SNPs*

476 For each novel locus, we identified a credible set, or the set of SNPs most likely to  
477 contain the causal variant, using a Bayesian method<sup>87</sup> implemented via LocusZoom.<sup>79</sup> To assess  
478 evidence for SNP-gene associations, SNPs in the credible set were queried against GTEx  
479 (version 8) *cis*-expression quantitative trait loci (*cis*-eQTL) results derived from SNP genotype  
480 and RNA-sequencing data across 44 tissues (N=126–209 for the 13 brain tissues).<sup>85</sup> The GTEx



481 portal (<https://gtexportal.org/home/>) presents significant single-tissue *cis*-eQTLs, based on a  
482 false discovery rate (FDR) <5%.

483 We also assessed single-tissue *cis*-eQTL evidence from the BrainSeq consortium that  
484 includes larger sample sizes with SNP genotype and RNA-sequencing data available in two brain  
485 tissues, dorsolateral prefrontal cortex (N=453) and hippocampus (N=447).<sup>42</sup> Of the 551  
486 individuals with data available in at least one brain tissue, 286 were schizophrenia cases;  
487 case/control status was included as a covariate for adjustment in the *cis*-eQTL analysis, as  
488 described elsewhere.<sup>88</sup> Significant *cis*-eQTLs at FDR <10% are available at  
489 <http://eqtl.brainseq.org/phase2/eqtl/>.

#### 490 **Data Availability**

491 The prior meta-analysis summary statistics<sup>22</sup> are available via dbGaP accession number  
492 phs001532.v1.p1. The summary statistics generated from the current study are included under  
493 version 2 of this dbGaP study (accession number phs001532.v2.p1), or are available upon  
494 request to the corresponding author (D.B.H.). Individual-level genotype and phenotype data for  
495 many of the contributing cohorts are also available via dbGaP, as outlined in the study  
496 descriptions in the Supplementary Information.

#### 497 **Conflicts of Interest**

498 L.J.B. and the spouse of N.L.S. are listed as inventors on U.S. Patent 8,080,371, ‘Markers  
499 for Addiction’ covering the use of certain SNPs in determining the diagnosis, prognosis, and  
500 treatment of addiction. Y.G. is an employee of GeneCentric Therapeutics. Although unrelated to  
501 this research, H.R.K. is an advisory board member for Dicerna and a member of the American  
502 Society of Clinical Psychopharmacology’s Alcohol Clinical Trials Initiative, which was  
503 supported in the last 3 years by AbbVie, Alkermes, Ethypharm, Indivior, Lilly, Lundbeck,

504 Otsuka, Pfizer, Arbor and Amygdala Neurosciences. H.R.K. and J.G. are named as inventors on  
505 PCT patent application #15/878,640 entitled: "Genotype-guided dosing of opioid agonists," filed  
506 January 24, 2018. J.K. consulted for Pfizer in 2012–2015 on ND. All other authors declare no  
507 conflict of interest.

## 508 **Acknowledgements**

509 We are grateful to the many study participants, who made this work possible. The meta-  
510 analysis was supported by the National Institute on Drug Abuse grant numbers R01 DA042090  
511 (PI: DBH) and R01 DA036583 (PI: LJB). The authors thank deCODE Genetics / Amgen and its  
512 investigators (Gunnar W. Reginsson, Thorgeir E. Thorgeirsson, and Kari Stefansson) for  
513 contributing and analyzing their data for inclusion in the meta-analysis. Their work was  
514 supported in part by NIDA R01 DA017932 (PI: Kari Stefansson). Acknowledgments for all  
515 other ND studies, contributed by the authors and/or made publicly available, are included in the  
516 Supplementary Information. This research also leveraged the UK Biobank Resource under  
517 Application Number 24603.

518

## 519 **Author Contributions**

520 Contributions of each author are categorized using terms from the Contributor Roles  
521 Taxonomy (<https://casrai.org/credit/>). Conceptualization: D.B.H., D.W.M., E.O.J., L.J.B.,  
522 M.J.B., M.R., N.E.C., T.B.B.; Data curation: B.C.Q., C.C.M., F.A., J.H., J.K., M.N., N.C.G.,  
523 N.E.C., N.L.S., R.G., S.Z., Y.G.; Formal analysis: A.W., B.C.Q., C.A.M., C.C.M., D.D., F.A.,  
524 H.Y., J.A.M., J.H., M.J.B., M.N., M.U.C., N.C.G., R.S., T.P., Y.G.; Funding acquisition: D.B.H.,  
525 D.M.D., D.W.M., E.O.J., J.K., L.J.B., M.R., W.G.I.; Investigation: D.I.B., E.O.J., F.A., G.W.,  
526 H.R.K., J.G., J.H., J.K., J.M.V., L.A.F., L.J.B., M.C.N., M.J.B., M.M., M.R., M.T.L., N.L.S.,

527 P.M., S.V., W.G.I.; Methodology: D.W.M.; Project administration: D.B.H., D.M.D., D.W.M.,  
528 J.K.; Resources: D.B.H., D.I.B., D.M.D., D.W.M., G.W., J.G., J.K., J.M.V., K.A.Y., L.A.F.,  
529 L.J.B., M.C.N., M.J.B., M.L.M., M.M., M.R., M.T.L., N.C.G., N.E.C., P.M., R.G., S.V., W.G.I.;  
530 Software: A.W., B.C.Q., H.W., J.A.M., M.U.C., N.C.G., N.Y.A.S.; Supervision: D.B.H.,  
531 D.M.D., D.W.M., E.O.J., J.K., M.J.B., M.N.; Validation: D.B.H., M.L.; Visualization: B.C.Q.,  
532 D.B.H., J.A.M., M.J.B.; Writing – original draft: B.C.Q., D.B.H., J.A.M., S.Z., T.B.B.; Writing –  
533 review & editing: A.W., B.C.Q., C.A.M., C.C.M., D.B.H., D.I.B., D.M.D., D.W.M., E.O.J., F.A.,  
534 G.W., H.R.K., J.E.H., J.G., J.K., J.M.V., K.A.Y., L.A.F., L.J.B., M.C.N., M.J.B., M.L.M., M.M.,  
535 M.R., M.T.L., N.C.G., N.E.C., N.L.S., P.M., S.V., T.B.B.

536

## 537 **References**

- 538 1. World Health Organization. WHO report on the global tobacco epidemic, 2017:  
539 monitoring tobacco use and prevention policies. (Geneva, 2017).
- 540 2. U.S. Department of Health and Human Services. *The Health Consequences of Smoking-*  
541 *50 Years of Progress: A Report of the Surgeon General*, (Atlanta (GA), 2014).
- 542 3. Sullivan, P.F. & Kendler, K.S. The genetic epidemiology of smoking. *Nicotine Tob Res* **1**  
543 **Suppl 2**, S51-7; discussion S69-70 (1999).
- 544 4. Agrawal, A. *et al.* The genetics of addiction-a translational perspective. *Transl Psychiatry*  
545 **2**, e140 (2012).
- 546 5. Liu, M. *et al.* Association studies of up to 1.2 million individuals yield new insights into  
547 the genetic etiology of tobacco and alcohol use. *Nat Genet* **51**, 237-244 (2019).
- 548 6. Hancock, D.B., Markunas, C.A., Bierut, L.J. & Johnson, E.O. Human Genetics of  
549 Addiction: New Insights and Future Directions. *Curr Psychiatry Rep* **20**, 8 (2018).

- 550 7. Baker, T.B. *et al.* Are tobacco dependence and withdrawal related amongst heavy  
551 smokers? Relevance to conceptualizations of dependence. *J Abnorm Psychol* **121**, 909-21  
552 (2012).
- 553 8. Zelman, D.C., Brandon, T.H., Jorenby, D.E. & Baker, T.B. Measures of affect and  
554 nicotine dependence predict differential response to smoking cessation treatments. *J*  
555 *Consult Clin Psychol* **60**, 943-52 (1992).
- 556 9. Gu, F. *et al.* Time to smoke first morning cigarette and lung cancer in a case-control  
557 study. *J Natl Cancer Inst* **106**, dju118 (2014).
- 558 10. Guertin, K.A. *et al.* Time to First Morning Cigarette and Risk of Chronic Obstructive  
559 Pulmonary Disease: Smokers in the PLCO Cancer Screening Trial. *PLoS One* **10**,  
560 e0125973 (2015).
- 561 11. Fagerstrom, K. Determinants of tobacco use and renaming the FTND to the Fagerstrom  
562 Test for Cigarette Dependence. *Nicotine Tob Res* **14**, 75-8 (2012).
- 563 12. Heatherton, T.F., Kozlowski, L.T., Frecker, R.C. & Fagerstrom, K.O. The Fagerstrom  
564 Test for Nicotine Dependence: a revision of the Fagerstrom Tolerance Questionnaire. *Br*  
565 *J Addict* **86**, 1119-27 (1991).
- 566 13. Breslau, N. & Johnson, E.O. Predicting smoking cessation and major depression in  
567 nicotine-dependent smokers. *Am J Public Health* **90**, 1122-7 (2000).
- 568 14. Agrawal, A. *et al.* A latent class analysis of DSM-IV and Fagerstrom (FTND) criteria for  
569 nicotine dependence. *Nicotine Tob Res* **13**, 972-81 (2011).
- 570 15. Paik, S.H. *et al.* Prevalence and analysis of tobacco use disorder in patients diagnosed  
571 with lung cancer. *PLoS One* **14**, e0220127 (2019).

- 572 16. Baker, T.B. *et al.* Time to first cigarette in the morning as an index of ability to quit  
573 smoking: implications for nicotine dependence. *Nicotine Tob Res* **9 Suppl 4**, S555-70  
574 (2007).
- 575 17. Sweitzer, M.M., Denlinger, R.L. & Donny, E.C. Dependence and withdrawal-induced  
576 craving predict abstinence in an incentive-based model of smoking relapse. *Nicotine Tob*  
577 *Res* **15**, 36-43 (2013).
- 578 18. Bolt, D.M. *et al.* The Wisconsin Predicting Patients' Relapse questionnaire. *Nicotine Tob*  
579 *Res* **11**, 481-92 (2009).
- 580 19. Haberstick, B.C. *et al.* Genes, time to first cigarette and nicotine dependence in a general  
581 population sample of young adults. *Addiction* **102**, 655-65 (2007).
- 582 20. Conway, K.P. *et al.* Data compatibility in the addiction sciences: an examination of  
583 measure commonality. *Drug Alcohol Depend* **141**, 153-8 (2014).
- 584 21. Hancock, D.B. *et al.* Genome-wide meta-analysis reveals common splice site acceptor  
585 variant in CHRNA4 associated with nicotine dependence. *Transl Psychiatry* **5**, e651  
586 (2015).
- 587 22. Hancock, D.B. *et al.* Genome-wide association study across European and African  
588 American ancestries identifies a SNP in DNMT3B contributing to nicotine dependence.  
589 *Mol Psychiatry* **23**, 1911-1919 (2018).
- 590 23. Thorgeirsson, T.E. *et al.* A variant associated with nicotine dependence, lung cancer and  
591 peripheral arterial disease. *Nature* **452**, 638-42 (2008).
- 592 24. Bierut, L.J. *et al.* Variants in nicotinic receptors and risk for nicotine dependence. *Am J*  
593 *Psychiatry* **165**, 1163-71 (2008).

- 594 25. Huedo-Medina, T.B., Sanchez-Meca, J., Marin-Martinez, F. & Botella, J. Assessing  
595 heterogeneity in meta-analysis: Q statistic or I2 index? *Psychol Methods* **11**, 193-206  
596 (2006).
- 597 26. DiFranza, J.R. *et al.* What aspect of dependence does the fagerstrom test for nicotine  
598 dependence measure? *ISRN Addict* **2013**, 906276 (2013).
- 599 27. Sey, N.Y.A. *et al.* A computational tool (H-MAGMA) for improved prediction of brain-  
600 disorder risk genes by incorporating brain chromatin interaction profiles. *Nat Neurosci*  
601 (2020).
- 602 28. Barbeira, A.N. *et al.* Integrating predicted transcriptome from multiple tissues improves  
603 association detection. *PLoS Genet* **15**, e1007889 (2019).
- 604 29. Bulik-Sullivan, B. *et al.* An atlas of genetic correlations across human diseases and traits.  
605 *Nat Genet* **47**, 1236-41 (2015).
- 606 30. Walters, R.K. *et al.* Transancestral GWAS of alcohol dependence reveals common  
607 genetic underpinnings with psychiatric disorders. *Nat Neurosci* **21**, 1656-1669 (2018).
- 608 31. Okbay, A. *et al.* Genetic variants associated with subjective well-being, depressive  
609 symptoms, and neuroticism identified through genome-wide analyses. *Nat Genet* **48**, 624-  
610 33 (2016).
- 611 32. Demontis, D. *et al.* Discovery of the first genome-wide significant risk loci for attention  
612 deficit/hyperactivity disorder. *Nat Genet* **51**, 63-75 (2019).
- 613 33. Stahl, E.A. *et al.* Genome-wide association study identifies 30 loci associated with  
614 bipolar disorder. *Nat Genet* **51**, 793-803 (2019).

- 615 34. Howard, D.M. *et al.* Genome-wide meta-analysis of depression identifies 102  
616 independent variants and highlights the importance of the prefrontal brain regions. *Nat*  
617 *Neurosci* **22**, 343-352 (2019).
- 618 35. Schizophrenia Working Group of the Psychiatric Genomics, C. Biological insights from  
619 108 schizophrenia-associated genetic loci. *Nature* **511**, 421-7 (2014).
- 620 36. McKay, J.D. *et al.* Large-scale association analysis identifies new lung cancer  
621 susceptibility loci and heterogeneity in genetic susceptibility across histological subtypes.  
622 *Nat Genet* **49**, 1126-1132 (2017).
- 623 37. Nikpay, M. *et al.* A comprehensive 1,000 Genomes-based genome-wide association  
624 meta-analysis of coronary artery disease. *Nat Genet* **47**, 1121-1130 (2015).
- 625 38. Lee, J.J. *et al.* Gene discovery and polygenic prediction from a genome-wide association  
626 study of educational attainment in 1.1 million individuals. *Nat Genet* **50**, 1112-1121  
627 (2018).
- 628 39. Pickrell, J.K. *et al.* Detection and interpretation of shared genetic influences on 42 human  
629 traits. *Nat Genet* **48**, 709-17 (2016).
- 630 40. Yang, J., Lee, S.H., Goddard, M.E. & Visscher, P.M. GCTA: a tool for genome-wide  
631 complex trait analysis. *Am J Hum Genet* **88**, 76-82 (2011).
- 632 41. Yang, J. *et al.* Conditional and joint multiple-SNP analysis of GWAS summary statistics  
633 identifies additional variants influencing complex traits. *Nat Genet* **44**, 369-75, S1-3  
634 (2012).
- 635 42. BrainSeq: A Human Brain Genomics Consortium. BrainSeq: Neurogenomics to Drive  
636 Novel Target Discovery for Neuropsychiatric Disorders. *Neuron* **88**, 1078-1083 (2015).

- 637 43. Ward, L.D. & Kellis, M. HaploReg: a resource for exploring chromatin states,  
638 conservation, and regulatory motif alterations within sets of genetically linked variants.  
639 *Nucleic Acids Res* **40**, D930-4 (2012).
- 640 44. Finucane, H.K. *et al.* Heritability enrichment of specifically expressed genes identifies  
641 disease-relevant tissues and cell types. *Nat Genet* **50**, 621-629 (2018).
- 642 45. GTEx Consortium. Human genomics. The Genotype-Tissue Expression (GTEx) pilot  
643 analysis: multitissue gene regulation in humans. *Science* **348**, 648-60 (2015).
- 644 46. Pers, T.H. *et al.* Biological interpretation of genome-wide association studies using  
645 predicted gene functions. *Nat Commun* **6**, 5890 (2015).
- 646 47. Fehrmann, R.S. *et al.* Gene expression analysis identifies global gene dosage sensitivity  
647 in cancer. *Nat Genet* **47**, 115-25 (2015).
- 648 48. Wain, L.V. *et al.* Novel insights into the genetics of smoking behaviour, lung function,  
649 and chronic obstructive pulmonary disease (UK BiLEVE): a genetic association study in  
650 UK Biobank. *Lancet Respir Med* **3**, 769-781 (2015).
- 651 49. Piper, M.E. *et al.* Refining the tobacco dependence phenotype using the Wisconsin  
652 Inventory of Smoking Dependence Motives. *J Abnorm Psychol* **117**, 747-61 (2008).
- 653 50. Piasecki, T.M., Piper, M.E. & Baker, T.B. Refining the tobacco dependence phenotype  
654 using the Wisconsin Inventory of Smoking Dependence Motives: II. Evidence from a  
655 laboratory self-administration assay. *J Abnorm Psychol* **119**, 513-23 (2010).
- 656 51. Piasecki, T.M., Piper, M.E. & Baker, T.B. Tobacco Dependence: Insights from  
657 Investigations of Self-Reported Smoking Motives. *Curr Dir Psychol Sci* **19**, 395-401  
658 (2010).



- 659 52. Piasecki, T.M., Piper, M.E., Baker, T.B. & Hunt-Carter, E.E. WISDM primary and  
660 secondary dependence motives: associations with self-monitored motives for smoking in  
661 two college samples. *Drug Alcohol Depend* **114**, 207-16 (2011).
- 662 53. Chen, X.D., Zhu, M.X. & Wang, S.J. Expression of long non-coding RNA MAGI2AS3  
663 in human gliomas and its prognostic significance. *Eur Rev Med Pharmacol Sci* **23**, 3455-  
664 3460 (2019).
- 665 54. Silva, J.P. *et al.* Latrophilin 1 and its endogenous ligand Lasso/teneurin-2 form a high-  
666 affinity transsynaptic receptor pair with signaling capabilities. *Proc Natl Acad Sci U S A*  
667 **108**, 12113-8 (2011).
- 668 55. Wang, K. *et al.* Common genetic variants on 5p14.1 associate with autism spectrum  
669 disorders. *Nature* **459**, 528-33 (2009).
- 670 56. Kerin, T. *et al.* A noncoding RNA antisense to moesin at 5p14.1 in autism. *Sci Transl*  
671 *Med* **4**, 128ra40 (2012).
- 672 57. Welter, D. *et al.* The NHGRI GWAS Catalog, a curated resource of SNP-trait  
673 associations. *Nucleic Acids Res* **42**, D1001-6 (2014).
- 674 58. Karlsson Linner, R. *et al.* Genome-wide association analyses of risk tolerance and risky  
675 behaviors in over 1 million individuals identify hundreds of loci and shared genetic  
676 influences. *Nat Genet* **51**, 245-257 (2019).
- 677 59. Erzurumluoglu, A.M. *et al.* Meta-analysis of up to 622,409 individuals identifies 40  
678 novel smoking behaviour associated genetic loci. *Mol Psychiatry* (2019).
- 679 60. Kichaev, G. *et al.* Leveraging Polygenic Functional Enrichment to Improve GWAS  
680 Power. *Am J Hum Genet* **104**, 65-75 (2019).

- 681 61. Buchwald, J. *et al.* Genome-wide association meta-analysis of nicotine metabolism and  
682 cigarette consumption measures in smokers of European descent. *Mol Psychiatry* (2020).
- 683 62. Lutz, S.M. *et al.* A genome-wide association study identifies risk loci for spirometric  
684 measures among smokers of European and African ancestry. *BMC Genet* **16**, 138 (2015).
- 685 63. Nagel, M. *et al.* Meta-analysis of genome-wide association studies for neuroticism in  
686 449,484 individuals identifies novel genetic loci and pathways. *Nat Genet* **50**, 920-927  
687 (2018).
- 688 64. Wray, N.R. *et al.* Genome-wide association analyses identify 44 risk variants and refine  
689 the genetic architecture of major depression. *Nat Genet* **50**, 668-681 (2018).
- 690 65. Perry, J.R. *et al.* Parent-of-origin-specific allelic associations among 106 genomic loci for  
691 age at menarche. *Nature* **514**, 92-97 (2014).
- 692 66. Day, F.R., Ong, K.K. & Perry, J.R.B. Elucidating the genetic basis of social interaction  
693 and isolation. *Nat Commun* **9**, 2457 (2018).
- 694 67. Kranzler, H.R. *et al.* Genome-wide association study of alcohol consumption and use  
695 disorder in 274,424 individuals from multiple populations. *Nat Commun* **10**, 1499 (2019).
- 696 68. Nievergelt, C.M. *et al.* International meta-analysis of PTSD genome-wide association  
697 studies identifies sex- and ancestry-specific genetic risk loci. *Nat Commun* **10**, 4558  
698 (2019).
- 699 69. Reginsson, G.W. *et al.* Polygenic risk scores for schizophrenia and bipolar disorder  
700 associate with addiction. *Addict Biol* (2017).
- 701 70. Hartz, S.M. *et al.* Genetic correlation between smoking behaviors and schizophrenia.  
702 *Schizophr Res* (2017).

- 703 71. Moulton, E.A., Elman, I., Becerra, L.R., Goldstein, R.Z. & Borsook, D. The cerebellum  
704 and addiction: insights gained from neuroimaging research. *Addict Biol* **19**, 317-31  
705 (2014).
- 706 72. Miquel, M. *et al.* Have we been ignoring the elephant in the room? Seven arguments for  
707 considering the cerebellum as part of addiction circuitry. *Neurosci Biobehav Rev* **60**, 1-11  
708 (2016).
- 709 73. Herculano-Houzel, S. & Lent, R. Isotropic fractionator: a simple, rapid method for the  
710 quantification of total cell and neuron numbers in the brain. *J Neurosci* **25**, 2518-21  
711 (2005).
- 712 74. Timofeeva, M.N. *et al.* Genetic polymorphisms in 15q25 and 19q13 loci, cotinine levels,  
713 and risk of lung cancer in EPIC. *Cancer Epidemiol Biomarkers Prev* **20**, 2250-61 (2011).
- 714 75. Martin, J., Taylor, M.J. & Lichtenstein, P. Assessing the evidence for shared genetic risks  
715 across psychiatric disorders and traits. *Psychol Med* **48**, 1759-1774 (2018).
- 716 76. Hjelmberg, J. *et al.* Lung cancer, genetic predisposition and smoking: the Nordic Twin  
717 Study of Cancer. *Thorax* **72**, 1021-1027 (2017).
- 718 77. Glasheen, C. *et al.* Is the Fagerstrom test for nicotine dependence invariant across secular  
719 trends in smoking? A question for cross-birth cohort analysis of nicotine dependence.  
720 *Drug Alcohol Depend* **185**, 127-132 (2018).
- 721 78. Willer, C.J., Li, Y. & Abecasis, G.R. METAL: fast and efficient meta-analysis of  
722 genomewide association scans. *Bioinformatics* **26**, 2190-1 (2010).
- 723 79. Pruim, R.J. *et al.* LocusZoom: regional visualization of genome-wide association scan  
724 results. *Bioinformatics* **26**, 2336-7 (2010).

- 725 80. Boyles, A.L., Harris, S.F., Rooney, A.A. & Thayer, K.A. Forest Plot Viewer: a new  
726 graphing tool. *Epidemiology* **22**, 746-7 (2011).
- 727 81. Nowakowski, T.J. *et al.* Spatiotemporal gene expression trajectories reveal  
728 developmental hierarchies of the human cortex. *Science* **358**, 1318-1323 (2017).
- 729 82. Wang, D. *et al.* Comprehensive functional genomic resource and integrative model for  
730 the human brain. *Science* **362**(2018).
- 731 83. Barbeira, A.N. *et al.* Exploring the phenotypic consequences of tissue specific gene  
732 expression variation inferred from GWAS summary statistics. *Nat Commun* **9**, 1825  
733 (2018).
- 734 84. Zheng, J. *et al.* LD Hub: a centralized database and web interface to perform LD score  
735 regression that maximizes the potential of summary level GWAS data for SNP  
736 heritability and genetic correlation analysis. *Bioinformatics* **33**, 272-279 (2017).
- 737 85. GTEx Consortium. *et al.* Genetic effects on gene expression across human tissues.  
738 *Nature* **550**, 204-213 (2017).
- 739 86. Machiela, M.J. & Chanock, S.J. LDlink: a web-based application for exploring  
740 population-specific haplotype structure and linking correlated alleles of possible  
741 functional variants. *Bioinformatics* **31**, 3555-7 (2015).
- 742 87. Wellcome Trust Case Control Consortium. *et al.* Bayesian refinement of association  
743 signals for 14 loci in 3 common diseases. *Nat Genet* **44**, 1294-301 (2012).
- 744 88. Collado-Torres, L. *et al.* Regional Heterogeneity in Gene Expression, Regulation, and  
745 Coherence in the Frontal Cortex and Hippocampus across Development and  
746 Schizophrenia. *Neuron* **103**, 203-216 e8 (2019).

**Table 1.** Lead single nucleotide polymorphism (SNP) associations from the five genome-wide significant loci in the Nicotine Dependence GenOmics (iNDiGO) consortium cross-ancestry meta-analysis for nicotine dependence (ND). Ancestry-specific association results are also presented.

| SNP (effect allele)                                   | Chr:position (NCBI build 37) | Gene / closest genes        | European ancestry-specific ND meta-analysis (total N = 46,213) |                 |                      | African American-specific ND meta-analysis (total N = 11,787) |                 |                      | Cross-ancestry ND meta-analysis (total N = 58,000) |                      |
|-------------------------------------------------------|------------------------------|-----------------------------|----------------------------------------------------------------|-----------------|----------------------|---------------------------------------------------------------|-----------------|----------------------|----------------------------------------------------|----------------------|
|                                                       |                              |                             | Effect allele freq. <sup>a</sup>                               | $\beta$ (SE)    | P                    | Effect allele freq. <sup>a</sup>                              | $\beta$ (SE)    | P                    | $\beta$ (SE)                                       | P                    |
| <b><u>Lead SNPs from novel ND-associated loci</u></b> |                              |                             |                                                                |                 |                      |                                                               |                 |                      |                                                    |                      |
| rs1862416 (T)                                         | 5:167,394,595                | <i>TENM2</i>                | 0.88                                                           | 0.037 (0.0074)  | $5.4 \times 10^{-7}$ | 0.94                                                          | 0.049 (0.0066)  | $6.6 \times 10^{-3}$ | 0.039 (0.0068)                                     | $1.5 \times 10^{-8}$ |
| rs2714700 (T)                                         | 7:79,367,667                 | <i>MAGI2</i> / <i>GNAII</i> | 0.47                                                           | -0.022 (0.0045) | $1.2 \times 10^{-6}$ | 0.72                                                          | -0.026 (0.0094) | $5.5 \times 10^{-3}$ | -0.023 (0.0041)                                    | $2.3 \times 10^{-8}$ |
| <b><u>Lead SNPs from known ND-associated loci</u></b> |                              |                             |                                                                |                 |                      |                                                               |                 |                      |                                                    |                      |

|                    |               |               |      |                    |                       |      |                   |                      |                   |                       |
|--------------------|---------------|---------------|------|--------------------|-----------------------|------|-------------------|----------------------|-------------------|-----------------------|
| rs13284520<br>(A)  | 9:136,502,572 | <i>DBH</i>    | 0.83 | 0.028<br>(0.0059)  | $1.7 \times 10^{-6}$  | 0.56 | 0.029<br>(0.0092) | $1.7 \times 10^{-3}$ | 0.029<br>(0.0050) | $1.1 \times 10^{-8}$  |
| rs16969968<br>(A)  | 15:78,882,925 | <i>CHRNA5</i> | 0.37 | 0.061<br>(0.0047)  | $4.9 \times 10^{-38}$ | 0.02 | 0.049<br>(0.018)  | $7.1 \times 10^{-3}$ | 0.060<br>(0.0046) | $1.6 \times 10^{-39}$ |
| rs151176846<br>(T) | 20:61,997,500 | <i>CHRNA4</i> | 0.92 | -0.067<br>(0.0094) | $1.2 \times 10^{-12}$ | 1.00 | NA                | NA                   | 0.067<br>(0.0094) | $1.2 \times 10^{-12}$ |

Abbreviations: NA, not available (due to monomorphism for rs151176846 among African Americans); NCBI, National Center for Biotechnology Information; SE, standard error.

<sup>a</sup> Frequencies correspond to 1000G European and African superpopulation reference panels.

**Table 2.** Single nucleotide polymorphisms (SNPs) identified as genome-wide significant for cigarettes per day (CPD) by the GWAS and Sequencing Consortium of Alcohol and Nicotine use (GSCAN) consortium and associated with nicotine dependence (ND) at  $P < 9.1 \times 10^{-4}$  ( $\alpha = 0.05/55$  tests) in the cross-ancestry meta-analysis by the Nicotine Dependence GenOmics (iNDiGO) consortium. Results are sorted by novelty and then by iNDiGO p-values, and  $\beta$  values correspond to direction of association for the effect alleles.

| SNP (effect allele)                                           | Chr:position<br>(NCBI build<br>37) | Gene / nearest gene(s) | GSCAN consortium meta-<br>analysis for CPD<br>(N=330,721) |        |                        | iNDiGO consortium meta-<br>analysis for ND (N=58,000) |        |                       |
|---------------------------------------------------------------|------------------------------------|------------------------|-----------------------------------------------------------|--------|------------------------|-------------------------------------------------------|--------|-----------------------|
|                                                               |                                    |                        | $\beta$                                                   | SE     | P                      | $\beta$                                               | SE     | P                     |
| <b><u>SNPs from loci not reported by prior GWAS of ND</u></b> |                                    |                        |                                                           |        |                        |                                                       |        |                       |
| rs7125588 (G)                                                 | 11:113,436,072                     | <i>DRD2 / TMPRSS5</i>  | -0.014                                                    | 0.0020 | $6.5 \times 10^{-12}$  | -0.016                                                | 0.0042 | $1.8 \times 10^{-4}$  |
| rs1592485 (A)                                                 | 16:52,093,549                      | <i>C16orf97</i>        | -0.013                                                    | 0.0021 | $1.1 \times 10^{-10}$  | -0.015                                                | 0.0043 | $4.5 \times 10^{-4}$  |
| rs2072659 (G)                                                 | 1:154,548,521                      | <i>CHRNA2</i>          | -0.025                                                    | 0.0038 | $2.5 \times 10^{-13}$  | -0.026                                                | 0.0078 | $8.4 \times 10^{-4}$  |
| <b><u>SNPs from loci reported by prior GWAS of ND</u></b>     |                                    |                        |                                                           |        |                        |                                                       |        |                       |
| rs146009840 (T)                                               | 15:78,906,177                      | <i>CHRNA3</i>          | 0.030                                                     | 0.0036 | $2.0 \times 10^{-17}$  | 0.060                                                 | 0.0046 | $2.6 \times 10^{-39}$ |
| rs72740955 (T)                                                | 15:78,849,779                      | <i>PSMA4 / CHRNA5</i>  | 0.040                                                     | 0.0033 | $2.4 \times 10^{-34}$  | 0.058                                                 | 0.0045 | $1.5 \times 10^{-38}$ |
| rs10519203 (A)                                                | 15:78,814,046                      | <i>HYKK</i>            | -0.075                                                    | 0.0021 | $3.1 \times 10^{-286}$ | -0.050                                                | 0.0042 | $7.7 \times 10^{-32}$ |

|                |               |                      |        |        |                       |        |        |                       |
|----------------|---------------|----------------------|--------|--------|-----------------------|--------|--------|-----------------------|
| rs8040868 (C)  | 15:78,911,181 | <i>CHRNA3</i>        | 0.022  | 0.0034 | $1.8 \times 10^{-10}$ | 0.044  | 0.0041 | $7.3 \times 10^{-27}$ |
| rs12438181 (A) | 15:78,812,098 | <i>HYKK</i>          | -0.023 | 0.0037 | $5.0 \times 10^{-10}$ | -0.039 | 0.0049 | $2.6 \times 10^{-15}$ |
| rs3743063 (C)  | 15:79,065,171 | <i>ADAMTS7</i>       | -0.023 | 0.0035 | $1.5 \times 10^{-11}$ | -0.030 | 0.0042 | $6.8 \times 10^{-13}$ |
| rs28681284 (T) | 15:78,908,565 | <i>CHRNA3</i>        | -0.049 | 0.0030 | $2.1 \times 10^{-58}$ | -0.035 | 0.0051 | $1.1 \times 10^{-11}$ |
| rs2273500 (C)  | 20:61,986,949 | <i>CHRNA4</i>        | 0.031  | 0.0029 | $3.5 \times 10^{-26}$ | 0.034  | 0.0058 | $4.0 \times 10^{-9}$  |
| rs3025383 (C)  | 9:136,502,369 | <i>DBH</i>           | -0.026 | 0.0026 | $9.8 \times 10^{-24}$ | -0.025 | 0.0049 | $1.8 \times 10^{-7}$  |
| rs28438420 (T) | 15:78,836,288 | <i>PSMA4</i>         | 0.020  | 0.0028 | $1.3 \times 10^{-12}$ | 0.020  | 0.0041 | $7.9 \times 10^{-7}$  |
| rs75596189 (T) | 9:136,468,701 | <i>FAM163B / DBH</i> | 0.035  | 0.0037 | $1.8 \times 10^{-20}$ | 0.030  | 0.0066 | $8.1 \times 10^{-6}$  |
| rs4236926 (G)  | 8:42,578,059  | <i>CHRNA3</i>        | 0.028  | 0.0024 | $7.7 \times 10^{-33}$ | 0.021  | 0.0048 | $1.6 \times 10^{-5}$  |
| rs56113850 (C) | 19:41,353,107 | <i>CYP2A6</i>        | 0.043  | 0.0021 | $4.0 \times 10^{-99}$ | 0.018  | 0.0042 | $2.1 \times 10^{-5}$  |
| rs1737894 (G)  | 20:31,054,702 | <i>NOLAL</i>         | 0.014  | 0.0021 | $9.9 \times 10^{-12}$ | 0.017  | 0.0043 | $1.1 \times 10^{-4}$  |

Abbreviations: NCBI, National Center for Biotechnology Information; SE, standard error.



**Figure 1.** Cross-ancestry nicotine dependence genome-wide association meta-analysis results, comprising 23 iNDiGO studies with total N = 58,000 European and African American ancestry ever smokers. The  $-\log_{10}$  meta-analysis p-values of single nucleotide polymorphisms (SNPs; depicted as circles) and insertions/deletions (indels; depicted as triangles) are plotted by chromosomal position. Five loci surpassed the genome-wide statistical significance threshold ( $P < 5 \times 10^{-8}$ , as marked by the solid horizontal black line).

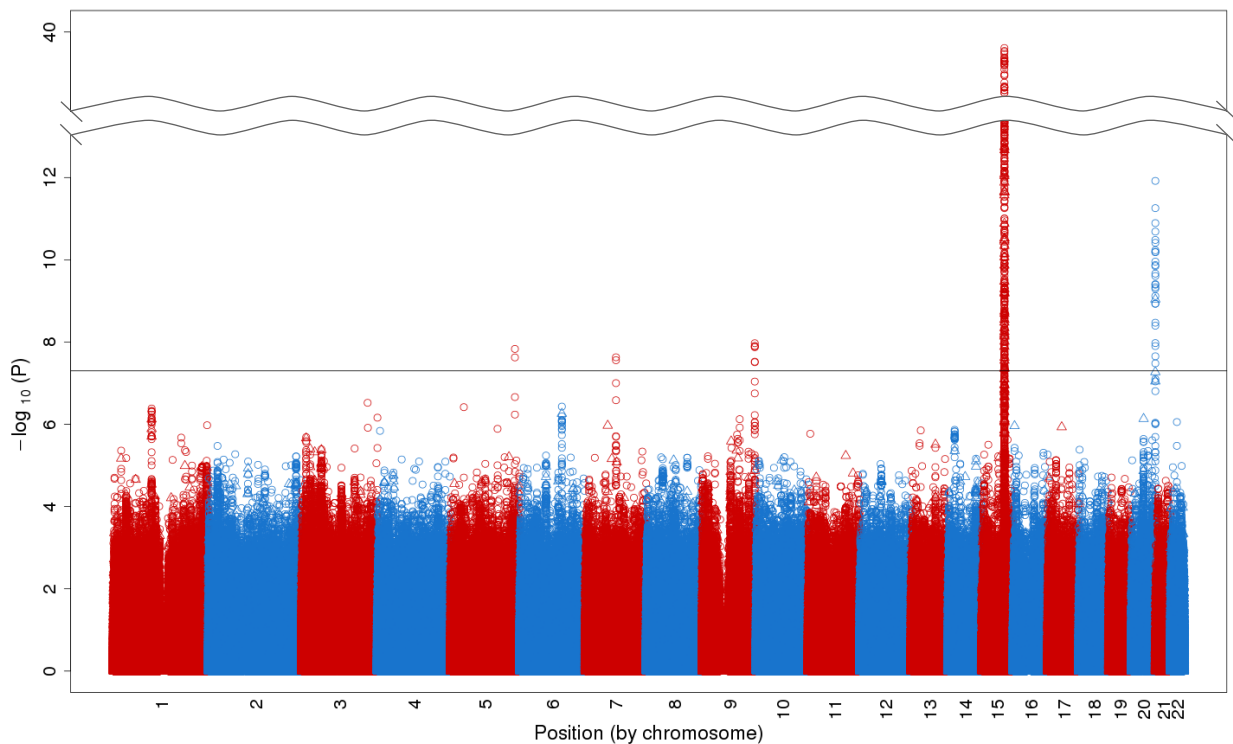

**Figure 2. Associations of novel single nucleotide polymorphisms (SNPs) with specific items of the Fagerström Test for Nicotine Dependence (FTND) across the iNDiGO studies.**

Associations are presented from cross-ancestry meta-analyses of the (A) *MAGI2/GNAII* SNP allele rs2714700-T and (B) *TENM2* SNP allele rs1862416-T. Beta ( $\beta$ ) and corresponding 95% confidence interval (CI) estimates were taken from linear regression models for categorical FTND item responses (1 and 4, closed diamonds) or logistic regression models for binary FTND item responses (2, 3, 5, and 6, open diamonds).

(A)

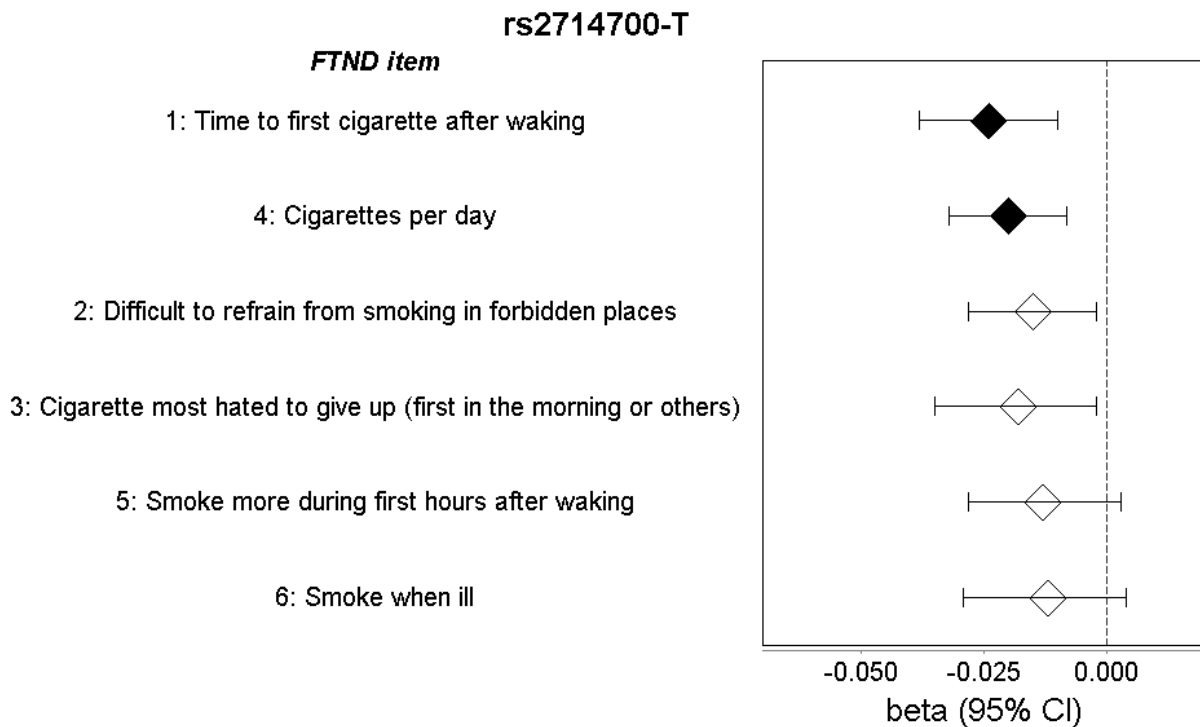

(B)

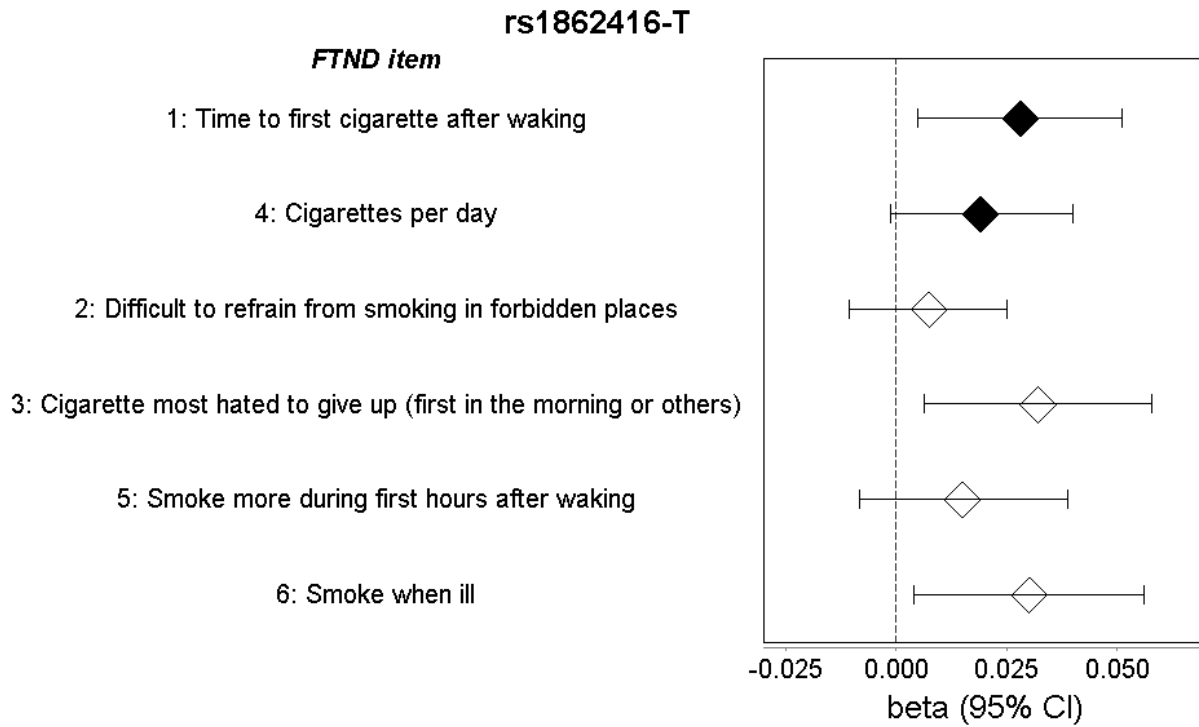

### Figure 3. Genetic correlations of nicotine dependence (ND) with 46 other phenotypes.

Correlations were calculated using linkage disequilibrium (LD) score regression with the iNDiGO European ancestry-specific GWAS meta-analysis results for ND (N=46,213), compared with results made available via LD Hub or study investigators (see Supplementary Table 3 for original references). Phenotypes were grouped by disease/trait or measurement category, as indicated by different colorings. Point estimates equate to genetic correlation ( $r_g$ ) values; error bars show the 95% confidence intervals; and the dotted vertical grey line corresponds to  $r_g=0$  (no correlation with ND). Phenotypes with significant correlations ( $P<0.0011$ ,  $\alpha=0.05/46$  tested) are bolded.

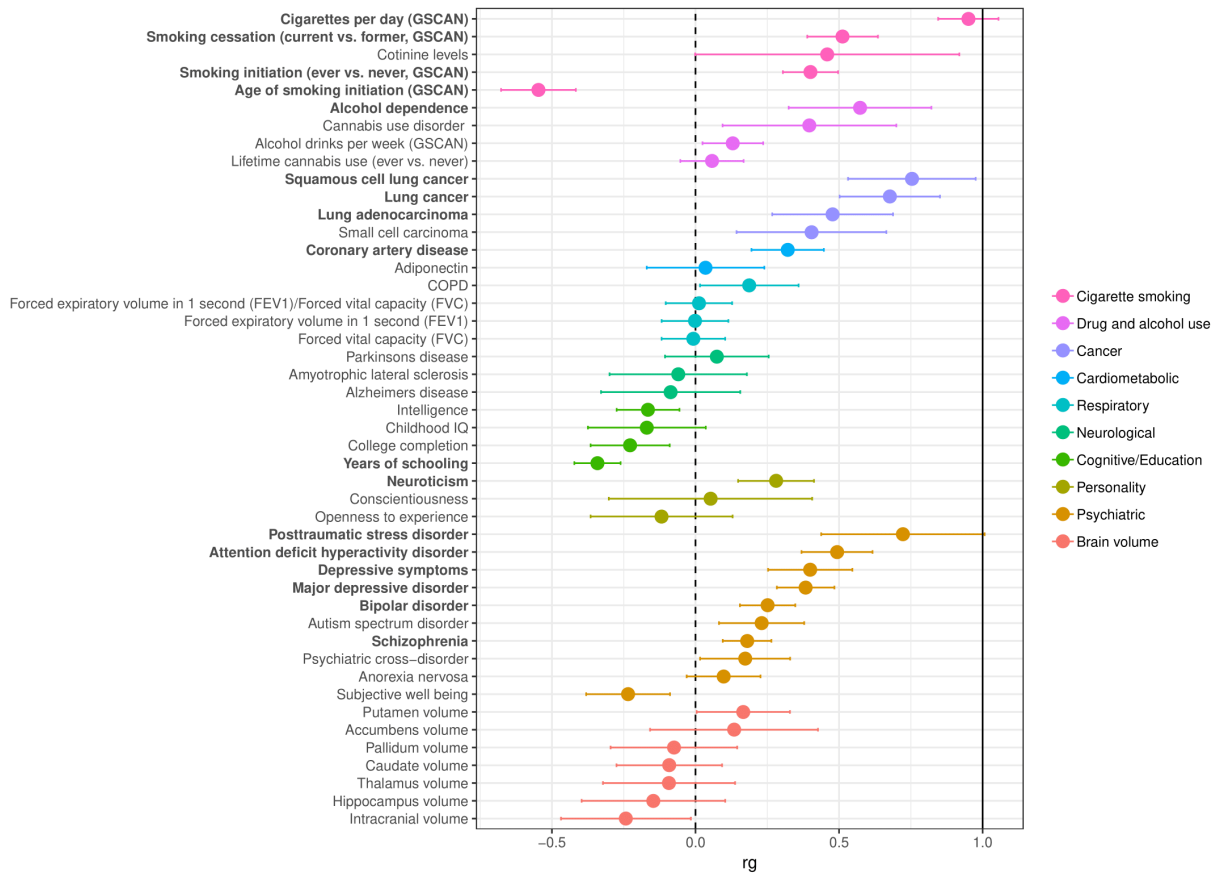

Source: https://www.biorxiv.org/content/10.1101/2020.01.15.898858v2.full.pdf
